# Supplementary material for: Incorporation of a Nitric Oxide Donating Motif into Novel PC-PLC Inhibitors Provides Enhanced Anti-Proliferative Activity
Source: MDPI journal article supplement (doi:10.3390/ijms222111518), 2021-10-26
Supplement: s1 [file s1]

## Supporting Information

### Incorporation of a nitric oxide donating motif into novel PC-PLC inhibitors provides enhanced anti-proliferative activity

Shaun W. P. Rees<sup>1</sup>, Tayla A. Rees<sup>2,3</sup>, Euphemia Leung<sup>3,4</sup>, Christopher S. Walker<sup>2,3</sup>, David Barker<sup>1,5\*</sup>, Lisa I. Pilkington<sup>1\*</sup>.

<sup>1</sup> School of Chemical Sciences, University of Auckland, Auckland, 1010, New Zealand.

<sup>2</sup> School of Biological Science, University of Auckland, Auckland, NZ.

<sup>3</sup> Maurice Wilkins Centre for Molecular Biodiscovery, University of Auckland, Auckland, New Zealand.

<sup>4</sup> Auckland Cancer Society Research Centre, University of Auckland, Grafton, Auckland, 1023, New Zealand.

<sup>5</sup> MacDiarmid Institute for Advanced Materials and Nanotechnology, Wellington, New Zealand.

## Table of Contents

|                                                                                 |               |
|---------------------------------------------------------------------------------|---------------|
| <b>General Experimental Details .....</b>                                       | <b>S1</b>     |
| <b>Synthesis of <i>N</i>-nitrosylated benzylamines 7a-m: .....</b>              | <b>S2</b>     |
| Methyl 5-((benzyl)(nitroso)amino)-2-morpholinobenzoate <b>7a</b> .....          | <b>S2</b>     |
| Methyl 5-((2'-fluorobenzyl)(nitroso)amino)-2-morpholinobenzoate <b>7b</b> ..... | <b>S3</b>     |
| Methyl 5-((3'-fluorobenzyl)(nitroso)amino)-2-morpholinobenzoate <b>7c</b> ..... | <b>S4</b>     |
| Methyl 5-((4'-fluorobenzyl)(nitroso)amino)-2-morpholinobenzoate <b>7d</b> ..... | <b>S5</b>     |
| Methyl 5-((2'-chlorobenzyl)(nitroso)amino)-2-morpholinobenzoate <b>7e</b> ..... | <b>S6</b>     |
| Methyl 5-((3'-chlorobenzyl)(nitroso)amino)-2-morpholinobenzoate <b>7f</b> ..... | <b>S7</b>     |
| Methyl 5-((4'-chlorobenzyl)(nitroso)amino)-2-morpholinobenzoate <b>7g</b> ..... | <b>S8</b>     |
| Methyl 5-((2'-bromobenzyl)(nitroso)amino)-2-morpholinobenzoate <b>7h</b> .....  | <b>S9</b>     |
| Methyl 5-((3'-bromobenzyl)(nitroso)amino)-2-morpholinobenzoate <b>7i</b> .....  | <b>S10</b>    |
| Methyl 5-((4'-bromobenzyl)(nitroso)amino)-2-morpholinobenzoate <b>7j</b> .....  | <b>S11</b>    |
| Methyl 5-((2'-methoxybenzyl)(nitroso)amino)-2-morpholinobenzoate <b>7k</b> ...  | <b>S12</b>    |
| Methyl 5-((3'-methoxybenzyl)(nitroso)amino)-2-morpholinobenzoate <b>7l</b> .... | <b>S13</b>    |
| Methyl 5-((4'-methoxybenzyl)(nitroso)amino)-2-morpholinobenzoate <b>7m</b> ..   | <b>S13</b>    |
| <b>NMR Spectra of <i>N</i>-nitrosylated benzylamines 7a-m: .....</b>            | <b>S15-27</b> |

## General experimental details.

NMR spectra were recorded using a Bruker Avance DRX 400 MHz spectrophotometer at ambient temperature. All chemical shifts are reported relative to the solvent peaks of DMSO- $d_6$  ( $\delta$  2.52 for  $^1\text{H}$  and  $\delta$  39.52 for  $^{13}\text{C}$ ) or  $\text{CDCl}_3$  ( $\delta$  7.26 for  $^1\text{H}$  and  $\delta$  77.16 for  $^{13}\text{C}$ ).  $^1\text{H}$  NMR data is reported in the following sequence: position ( $\delta$ ), relative integral, multiplicity (s, singlet; d, doublet; t, triplet; q, quartet; dd, doublet of doublets; m, multiplet; br s, broad singlet; br d, broad doublet), coupling constant ( $J$ , Hz), and proton assignment.  $^{13}\text{C}$  NMR data was reported in the following sequence: position ( $\delta$ ), multiplicity (d, doublet), coupling constant ( $J$ , Hz), and the carbon assignment. NMR assignments were made using a combination of  $^1\text{H}$  NMR,  $^{13}\text{C}$  NMR, HSQC and HMBC experiments. High-resolution mass spectroscopy (HRMS) was carried out using electrospray ionisation (ESI) on a MicroTOF-Q mass spectrometer. All reactions were carried out using dried AR grade solvents under a nitrogen atmosphere, all chemical reagents were purchased from AK scientific (Union City, CA, USA) and used as purchased.

Thin-layer chromatography (TLC) was carried out on Merck silica gel F354 aluminium plates pre-coated with silica and flash chromatography was conducted with Silica Gel 60 (40–63  $\mu\text{m}$ , 230-430 mesh ASTM) using solvent systems specified in the experimental procedures. Melting points were measured using a Reicher-Kofler block, able to measure melting points up to 230  $^\circ\text{C}$ ; melting points reported in this study are uncorrected. IR spectra were recorded using a Perkin-Elmer Spectrum 1000 series Fourier Transform Infra-Red ATR spectrometer. High-resolution mass spectroscopy (HRMS) was carried out using electrospray ionisation (ESI) on a MicroTOF-Q mass spectrometer.

## Synthesis of *N*-nitrosylated benzylamines 7a-m

### Methyl 5-((benzyl)(nitroso)amino)-2-morpholinobenzoate 7a

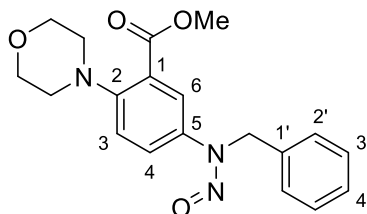

The reaction was carried out following General Procedure 3.1.2, methyl 5-((benzyl)amino)-2-morpholinobenzoate **6a** (0.075 g, 0.23 mmol), NaNO<sub>2</sub> (0.017 g, 0.24 mmol) and *para*-toluenesulfonic acid monohydrate (0.043g, 0.24 mmol) in CH<sub>2</sub>Cl<sub>2</sub> (5 mL) for 19 h. The crude product was purified using flash chromatography (4:1 petroleum ether, ethyl acetate) to give the *title product* **7a** (0.069 g, 84%) as a yellow solid. M.p.: 79 - 81 °C. R<sub>f</sub>: 0.34 (2:1 petroleum ether, ethyl acetate). IR:  $\nu_{\text{max}}$  (film)/cm<sup>-1</sup>; 2953 (CH aromatic), 2872 (CH alkane), 1720 (C=O ester), 1451 (N=O), 1211 and 1129 (C-O ether).  $\delta_{\text{H}}$  (400 MHz; (CD<sub>3</sub>)<sub>2</sub>SO) 2.98 (4H, t, *J* = 4.5 Hz, N(CH<sub>2</sub>CH<sub>2</sub>)<sub>2</sub>O), 3.70 (4H, t, *J* = 4.5 Hz, N(CH<sub>2</sub>CH<sub>2</sub>)<sub>2</sub>O), 3.81 (3H, s, COOCH<sub>3</sub>), 5.32 (2H, s, CH<sub>2</sub>), 7.06 (2H, d, *J* = 7.5 Hz, H-2'), 7.19 – 7.25 (2H, m, H-3, H-4'), 7.29 (2H, t, *J* = 7.5 Hz, H-3'), 7.70 (1H, dd, *J* = 9.0, 3.0 Hz, H-4) and 7.85 (1H, d, *J* = 3.0 Hz, H-6).  $\delta_{\text{C}}$  (100 MHz; (CD<sub>3</sub>)<sub>2</sub>SO) 46.2 (CH<sub>2</sub>), 51.9 (N(CH<sub>2</sub>CH<sub>2</sub>)<sub>2</sub>O), 52.2 (COOCH<sub>3</sub>), 66.2 (N(CH<sub>2</sub>CH<sub>2</sub>)<sub>2</sub>O), 119.8 (C-3), 122.5 (C-6), 124.1 (C-1), 124.2 (C-4), 127.1 (C-2'), 127.4 (C-4'), 128.7 (C-3'), 134.3 (C-5), 134.5 (C-1'), 150.5 (C-2) and 167.1 (C=O). *m/z* (ESI<sup>+</sup>): 378 (MNa<sup>+</sup>, 50%), 348 (100), 326 (30). HRMS (ESI<sup>+</sup>): Found (MNa<sup>+</sup>): 378.1429, C<sub>19</sub>H<sub>21</sub>N<sub>3</sub>NaO<sub>4</sub> requires 378.1424.

**Methyl 5-((2-fluorobenzyl)(nitroso)amino)-2-morpholinobenzoate **7b****

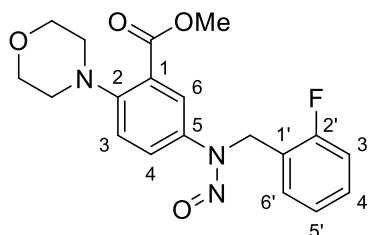

The reaction was carried out following General Procedure **3.1.2**, using methyl 5-((2-fluorobenzyl)amino)-2-morpholinobenzoate **6b** (0.075 g, 0.22 mmol), NaNO<sub>2</sub> (0.016 g, 0.23 mmol) and *para*-toluenesulfonic acid monohydrate (0.044g, 0.23 mmol) in CH<sub>2</sub>Cl<sub>2</sub> (5 mL) for 26 h. The crude product was purified using flash chromatography (4:1 petroleum ether, ethyl acetate) to give the *title product* **7b** (0.060 g, 74%) as a brown solid. M.p.: 89 - 90 °C. Rf: 0.43 (2:1 petroleum ether, ethyl acetate). IR:  $\nu_{\text{max}}$  (film)/cm<sup>-1</sup>; 2972 (CH aromatic), 2860 (CH alkane), 1721 (C=O ester), 1453 (N=O), 1229 and 1129 (C-O ether).  $\delta_{\text{H}}$  (400 MHz; (CD<sub>3</sub>)<sub>2</sub>CO) 3.05 (4H, t,  $J$  = 4.5 Hz, N(CH<sub>2</sub>CH<sub>2</sub>)<sub>2</sub>O), 3.76 (4H, t,  $J$  = 4.5 Hz, N(CH<sub>2</sub>CH<sub>2</sub>)<sub>2</sub>O), 3.86 (3H, s, COOCH<sub>3</sub>), 5.35 (2H, s, CH<sub>2</sub>), 7.05 (1H, t,  $J$  = 7.5 Hz, H-6'), 7.08 – 7.14 (2H, m, H-3' and H-5'), 7.23 (1H, d,  $J$  = 9.0 Hz, H-3), 7.30 (1H, q,  $J$  = 7.5 Hz, H-4'), 7.69 (1H, dd,  $J$  = 9.0, 3.0 Hz, H-4) and 7.92 (1H, d,  $J$  = 3.0 Hz, H-6).  $\delta_{\text{C}}$  (100 MHz; (CD<sub>3</sub>)<sub>2</sub>CO) 41.7 (CH<sub>2</sub>), 52.5 (COOCH<sub>3</sub>), 53.4 (N(CH<sub>2</sub>CH<sub>2</sub>)<sub>2</sub>O), 67.5 (N(CH<sub>2</sub>CH<sub>2</sub>)<sub>2</sub>O), 116.3 (d,  $^2J_{\text{F/C}}$  = 21.7 Hz, C-3'), 120.8 (C-3), 122.5 (d,  $^2J_{\text{F/C}}$  = 14.7 Hz, C-1'), 124.1 (C-6), 125.3 (C-4), 125.4 (d,  $^4J_{\text{F/C}}$  = 3.1 Hz, C-5'), 126.0 (C-1), 130.3 (d,  $^3J_{\text{F/C}}$  = 3.7 Hz, C-4'), 130.5 (d,  $^3J_{\text{F/C}}$  = 8.4 Hz, C-6'), 135.9 (C-5), 152.2 (C-2), 161.3 (d,  $^1J_{\text{F/C}}$  = 245.5 Hz, C-2') and 167.9 (C=O).  $m/z$  (ESI<sup>+</sup>): 396 (MNa<sup>+</sup>, 90%), 366 (100), 344 (50). HRMS (ESI<sup>+</sup>): Found (MNa<sup>+</sup>): 396.1327, C<sub>19</sub>H<sub>21</sub>N<sub>3</sub>NaO<sub>4</sub> requires 396.1330.

### Methyl 5-((3-fluorobenzyl)(nitroso)amino)-2-morpholinobenzoate **7c**

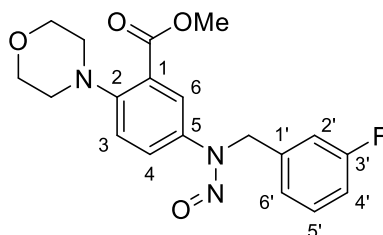

The reaction was carried out following General Procedure **3.1.2**, using methyl 5-((3-fluorobenzyl)amino)-2-morpholinobenzoate **6c** (0.075 g, 0.22 mmol),  $\text{NaNO}_2$  (0.016 g, 0.23 mmol) and *para*-toluenesulfonic acid monohydrate (0.044g, 0.23 mmol) in  $\text{CH}_2\text{Cl}_2$  (5 mL) for 22 h. The crude product was purified using flash chromatography (4:1 petroleum ether, ethyl acetate) to give the *title product* **7c** (0.076 g, 94%) as a brown solid. M.p.: 83 - 85 °C. Rf: 0.43 (2:1 petroleum ether, ethyl acetate). IR:  $\nu_{\text{max}}$  (film)/ $\text{cm}^{-1}$ : 2951 (CH aromatic), 2849 (CH alkane), 1724 (C=O ester), 1453 (N=O), 1229 and 1113 (C-O ether).  $\delta_{\text{H}}$  (400 MHz;  $\text{CDCl}_3$ ) 3.07 (4H, t,  $J$  = 4.5 Hz,  $\text{N}(\text{CH}_2\text{CH}_2)_2\text{O}$ ), 3.86 (4H, t,  $J$  = 4.5 Hz,  $\text{N}(\text{CH}_2\text{CH}_2)_2\text{O}$ ), 3.89 (3H, s,  $\text{COOCH}_3$ ), 5.20 (2H, s,  $\text{CH}_2$ ), 6.79 (1H, dt,  $J$  = 9.5, 2.0 Hz, H-2'), 6.87 (1H, dd,  $J$  = 8.5, 1.0 Hz, H-6'), 6.95 (1H, td,  $J$  = 8.5, 2.5 Hz, H-4'), 7.09 (1H, d,  $J$  = 9.0 Hz, H-3), 7.23 – 7.29 (1H, m, H-5'), 7.55 (1H, dd,  $J$  = 9.0, 3.0 Hz, H-4) and 7.93 (1H, d,  $J$  = 3.0 Hz, H-6).  $\delta_{\text{C}}$  (100 MHz;  $\text{CDCl}_3$ ) 46.9 ( $\text{CH}_2$ ), 52.5 ( $\text{COOCH}_3$ ), 52.9 ( $\text{N}(\text{CH}_2\text{CH}_2)_2\text{O}$ ), 67.1 ( $\text{N}(\text{CH}_2\text{CH}_2)_2\text{O}$ ), 114.5 (d,  $^2J_{\text{F/C}}$  = 22.4 Hz, C-2'), 115.0 (d,  $^2J_{\text{F/C}}$  = 21.0 Hz, C-4'), 120.0 (C-3), 123.0 (d,  $^4J_{\text{F/C}}$  = 2.8 Hz, C-6'), 123.3 (C-6), 124.2 (C-4), 124.7 (C-1), 130.6 (d,  $^3J_{\text{F/C}}$  = 8.3 Hz, C-5'), 135.4 (C-5), 136.6 (d,  $^3J_{\text{F/C}}$  = 7.3 Hz, C-1'), 151.7 (C-2), 163.1 (d,  $^1J_{\text{F/C}}$  = 247.1 Hz, C-3') and 167.1 (C=O).  $m/z$  (ESI+): 396 ( $\text{MNa}^+$ , 100%), 366 (90), 344 (45). HRMS (ESI+): Found ( $\text{MNa}^+$ ): 396.1334,  $\text{C}_{19}\text{H}_{21}\text{N}_3\text{NaO}_4$  requires 396.1330.

### Methyl 5-((4-fluorobenzyl)(nitroso)amino)-2-morpholinobenzoate **7d**

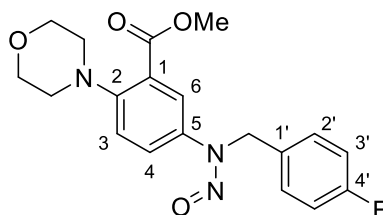

The reaction was carried out following General Procedure **3.1.2**, using methyl 5-((4-fluorobenzyl)amino)-2-morpholinobenzoate **6d** (0.075 g, 0.22 mmol), NaNO<sub>2</sub> (0.016 g, 0.23 mmol) and *para*-toluenesulfonic acid monohydrate (0.044g, 0.23 mmol) in CH<sub>2</sub>Cl<sub>2</sub> (5 mL) for 20 h. The crude product was purified using flash chromatography (4:1 petroleum ether, ethyl acetate) to give the *title product* **7d** (0.067 g, 82%) as a yellow solid. M.p.: 73 - 75 °C. R<sub>f</sub>: 0.46 (2:1 petroleum ether, ethyl acetate). IR: ν<sub>max</sub> (film)/cm<sup>-1</sup>; 2956 (CH aromatic), 2863 (CH alkane), 1724 (C=O ester), 1457 (N=O), 1221 and 1117 (C-O ether). δ<sub>H</sub> (400 MHz; (CD<sub>3</sub>)<sub>2</sub>CO) 3.04 (4H, t, *J* = 4.5 Hz, N(CH<sub>2</sub>CH<sub>2</sub>)<sub>2</sub>O), 3.76 (4H, t, *J* = 4.5 Hz, N(CH<sub>2</sub>CH<sub>2</sub>)<sub>2</sub>O), 3.86 (3H, s, COOCH<sub>3</sub>), 5.32 (2H, s, CH<sub>2</sub>), 7.06 (2H, t, *J* = 8.0 Hz, H-3'), 7.18 (2H, t, *J* = 8.0 Hz, H-2'), 7.23 (1H, d, *J* = 9.0 Hz, H-3), 7.68 (1H, dd, *J* = 9.0, 3.0 Hz, H-4) and 7.90 (1H, d, *J* = 3.0 Hz, H-6). δ<sub>C</sub> (100 MHz; (CD<sub>3</sub>)<sub>2</sub>CO) 46.6 (CH<sub>2</sub>), 52.5 (COOCH<sub>3</sub>), 53.4 (N(CH<sub>2</sub>CH<sub>2</sub>)<sub>2</sub>O), 67.5 (N(CH<sub>2</sub>CH<sub>2</sub>)<sub>2</sub>O), 116.3 (d, <sup>2</sup>*J*<sub>F/C</sub> = 22.1 Hz, C-3'), 120.8 (C-3), 123.9 (C-6), 125.1 (C-4), 126.1 (C-1), 130.4 (d, <sup>3</sup>*J*<sub>F/C</sub> = 8.5 Hz, C-2'), 131.9 (d, <sup>4</sup>*J*<sub>F/C</sub> = 3.5 Hz, C-1'), 136.0 (C-5), 152.1 (C-2), 162.9 (d, <sup>1</sup>*J*<sub>F/C</sub> = 244.2 Hz, C-4') and 168.0 (C=O). *m/z* (ESI<sup>+</sup>): 396 (MNa<sup>+</sup>, 90%), 366 (100), 344 (50). HRMS (ESI<sup>+</sup>): Found (MNa<sup>+</sup>): 396.1331, C<sub>19</sub>H<sub>21</sub>N<sub>3</sub>NaO<sub>4</sub> requires 396.1330.

### Methyl 5-((2-chlorobenzyl)(nitroso)amino)-2-morpholinobenzoate **7e**

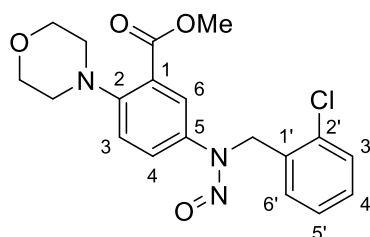

The reaction was carried out following General Procedure **3.1.2**, using methyl 5-((2-chlorobenzyl)amino)-2-morpholinobenzoate **6e** (0.075 g, 0.21 mmol), NaNO<sub>2</sub> (0.016 g, 0.22 mmol) and *para*-toluenesulfonic acid monohydrate (0.044g, 0.22 mmol) in CH<sub>2</sub>Cl<sub>2</sub> (5 mL) for 3 d. The crude product was purified using flash chromatography (4:1 petroleum ether, ethyl acetate) to give the *title product* **7e** (0.061 g, 75%) as an orange solid. M.p.: 72 - 74 °C. Rf: 0.50 (2:1 petroleum ether, ethyl acetate). IR:  $\nu_{\text{max}}$  (film)/cm<sup>-1</sup>: 2957 (CH aromatic), 2860 (CH alkane), 1726 (C=O ester), 1463 (N=O), 1231 and 1112 (C-O ether).  $\delta_{\text{H}}$  (400 MHz; CDCl<sub>3</sub>) 3.06 (4H, t,  $J$  = 4.5 Hz, N(CH<sub>2</sub>CH<sub>2</sub>)<sub>2</sub>O), 3.86 (4H, t,  $J$  = 4.5 Hz, N(CH<sub>2</sub>CH<sub>2</sub>)<sub>2</sub>O), 3.89 (3H, s, COOCH<sub>3</sub>), 5.30 (2H, s, CH<sub>2</sub>), 6.81 (1H, dd,  $J$  = 7.5, 1.5 Hz, H-6'), 7.08 (1H, d,  $J$  = 9.0 Hz, H-3), 7.14 (1H, td,  $J$  = 7.5, 1.5 Hz, H-5'), 7.20 (1H, td,  $J$  = 7.5, 2.0 Hz, H-4'), 7.37 (1H, dd,  $J$  = 8.0, 1.5 Hz, H-3'), 7.54 (1H, dd,  $J$  = 9.0, 3.0 Hz, H-4) and 7.95 (1H, d,  $J$  = 3.0 Hz, H-6).  $\delta_{\text{C}}$  (100 MHz; CDCl<sub>3</sub>) 45.2 (CH<sub>2</sub>), 52.5 (COOCH<sub>3</sub>), 52.9 (N(CH<sub>2</sub>CH<sub>2</sub>)<sub>2</sub>O), 67.1 (N(CH<sub>2</sub>CH<sub>2</sub>)<sub>2</sub>O), 119.9 (C-3), 123.1 (C-6), 123.9 (C-4), 124.8 (C-1), 127.4 (C-5'), 128.1 (C-6'), 129.2 (C-4'), 129.9 (C-3'), 131.3 (C-1'), 132.9 (C-2'), 135.4 (C-5), 151.6 (C-2) and 167.2 (C=O).  $m/z$  (ESI<sup>+</sup>): 414 (<sup>37</sup>ClMNa<sup>+</sup>, 30%), 412 (<sup>35</sup>ClMNa<sup>+</sup>, 90), 384 (33), 382 (100). HRMS (ESI<sup>+</sup>): Found (MNa<sup>+</sup>): 414.0997, C<sub>19</sub>H<sub>20</sub><sup>37</sup>ClN<sub>3</sub>NaO<sub>4</sub> requires 414.1012. Found (MNa<sup>+</sup>): 412.1021, C<sub>19</sub>H<sub>20</sub><sup>35</sup>ClN<sub>3</sub>NaO<sub>4</sub> requires 412.1035.



## Methyl 5-((3-chlorobenzyl)(nitroso)amino)-2-morpholinobenzoate **7f**

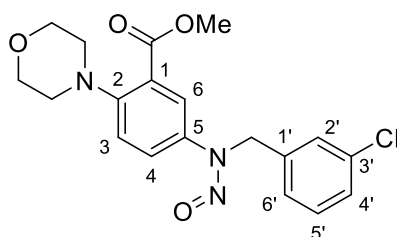

The reaction was carried out following General Procedure **3.1.2**, using methyl 5-((3-chlorobenzyl)amino)-2-morpholinobenzoate **6f** (0.075 g, 0.21 mmol),  $\text{NaNO}_2$  (0.016 g, 0.22 mmol) and *para*-toluenesulfonic acid monohydrate (0.044g, 0.22 mmol) in  $\text{CH}_2\text{Cl}_2$  (5 mL) for 2 d. The crude product was purified using flash chromatography (4:1 petroleum ether, ethyl acetate) to give the *title product* **6f** (0.051 g, 63%) as a red solid. M.p.: 84 - 86 °C. Rf: 0.37 (2:1 petroleum ether, ethyl acetate). IR:  $\nu_{\text{max}}$  (film)/ $\text{cm}^{-1}$ ; 2971 (CH aromatic), 2821 (CH alkane), 1728 (C=O ester), 1433 (N=O), 1224 and 1111 (C-O ether).  $\delta_{\text{H}}$  (400 MHz;  $(\text{CD}_3)_2\text{SO}$ ) 2.98 (4H, t,  $J = 4.5$  Hz,  $\text{N}(\text{CH}_2\text{CH}_2)_2\text{O}$ ), 3.70 (4H, t,  $J = 4.5$  Hz,  $\text{N}(\text{CH}_2\text{CH}_2)_2\text{O}$ ), 3.82 (3H, s,  $\text{COOCH}_3$ ), 5.33 (2H, s,  $\text{CH}_2$ ), 7.00 (1H, t,  $J = 7.5$  Hz, H-6'), 7.17 (1H, s, H-2'), 7.21 (1H, d,  $J = 9.0$  Hz, H-3), 7.30 – 7.33 (2H, m, H-4' and H-5'), 7.70 (1H, dd,  $J = 9.0, 3.0$  Hz, H-4) and 7.86 (1H, d,  $J = 3.0$  Hz, H-6).  $\delta_{\text{C}}$  (100 MHz;  $(\text{CD}_3)_2\text{SO}$ ) 45.8 ( $\text{CH}_2$ ), 51.9 ( $\text{N}(\text{CH}_2\text{CH}_2)_2\text{O}$ ), 52.3 ( $\text{COOCH}_3$ ), 66.2 ( $\text{N}(\text{CH}_2\text{CH}_2)_2\text{O}$ ), 119.8 (C-3), 122.4 (C-6), 124.0 (C-1), 124.2 (C-4), 125.6 (C-6'), 127.1 (C-2'), 127.5 (C-4'), 130.6 (C-5'), 133.2 (C-3'), 134.1 (C-5), 137.0 (C-1'), 150.5 (C-2) and 167.0 (C=O).  $m/z$  (ESI<sup>+</sup>): 414 ( $^{37}\text{ClMNa}^+$ , 33%), 412 ( $^{35}\text{ClMNa}^+$ , 100), 384 (30), 382 (90). HRMS (ESI<sup>+</sup>): Found ( $\text{MNa}^+$ ): 414.0985,  $\text{C}_{19}\text{H}_{20}^{37}\text{ClN}_3\text{NaO}_4$  requires 414.1012. Found ( $\text{MNa}^+$ ): 412.1024,  $\text{C}_{19}\text{H}_{20}^{35}\text{ClN}_3\text{NaO}_4$  requires 412.1035.

### Methyl 5-((4-chlorobenzyl)(nitroso)amino)-2-morpholinobenzoate **7g**

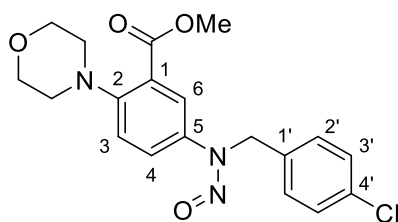

The reaction was carried out following General Procedure **3.1.2**, using methyl 5-((4-chlorobenzyl)amino)-2-morpholinobenzoate **6g** (0.075 g, 0.21 mmol), NaNO<sub>2</sub> (0.016 g, 0.22 mmol) and *para*-toluenesulfonic acid monohydrate (0.044g, 0.22 mmol) in CH<sub>2</sub>Cl<sub>2</sub> (5 mL) for 18 h. The crude product was purified using flash chromatography (4:1 petroleum ether, ethyl acetate) to give the *title product* **7g** (0.066 g, 81%) as a light brown solid. M.p.: 86 - 88 °C. R<sub>f</sub>: 0.35 (2:1 petroleum ether, ethyl acetate). IR:  $\nu_{\text{max}}$  (film)/cm<sup>-1</sup>; 2962 (CH aromatic), 2821 (CH alkane), 1708 (C=O ester), 1446 (N=O), 1265 and 1114 (C-O ether).  $\delta_{\text{H}}$  (400 MHz; (CD<sub>3</sub>)<sub>2</sub>SO) 2.98 (4H, t, *J* = 4.5 Hz, N(CH<sub>2</sub>CH<sub>2</sub>)<sub>2</sub>O), 3.70 (4H, t, *J* = 4.5 Hz, N(CH<sub>2</sub>CH<sub>2</sub>)<sub>2</sub>O), 3.82 (3H, s, COOCH<sub>3</sub>), 5.31 (2H, s, CH<sub>2</sub>), 7.10 (2H, d, *J* = 8.0 Hz, H-2'), 7.20 (1H, d, *J* = 9.0 Hz, H-3), 7.35 (2H, d, *J* = 8.0 Hz, H-3'), 7.69 (1H, dd, *J* = 9.0, 3.0 Hz, H-4) and 7.84 (1H, d, *J* = 3.0 Hz, H-6).  $\delta_{\text{C}}$  (100 MHz; (CD<sub>3</sub>)<sub>2</sub>SO) 45.7 (CH<sub>2</sub>), 51.9 (N(CH<sub>2</sub>CH<sub>2</sub>)<sub>2</sub>O), 52.3 (COOCH<sub>3</sub>), 66.2 (N(CH<sub>2</sub>CH<sub>2</sub>)<sub>2</sub>O), 119.8 (C-3), 122.5 (C-6), 124.2 (C-1), 124.3 (C-4), 128.7 (C-3'), 129.1 (C-2'), 132.0 (C-4'), 133.5 (C-1'), 134.1 (C-5), 150.3 (C-2) and 167.0 (C=O). *m/z* (ESI<sup>+</sup>): 414 (<sup>37</sup>ClMNa<sup>+</sup>, 33%), 412 (<sup>35</sup>ClMNa<sup>+</sup>, 100), 398 (90), 396 (30). HRMS (ESI<sup>+</sup>): Found (MNa<sup>+</sup>): 414.1026, C<sub>19</sub>H<sub>20</sub><sup>37</sup>ClN<sub>3</sub>NaO<sub>4</sub> requires 414.1012. Found (MNa<sup>+</sup>): 412.1021, C<sub>19</sub>H<sub>20</sub><sup>35</sup>ClN<sub>3</sub>NaO<sub>4</sub> requires 412.1035.

### Methyl 5-((2-bromobenzyl)(nitroso)amino)-2-morpholinobenzoate **7h**

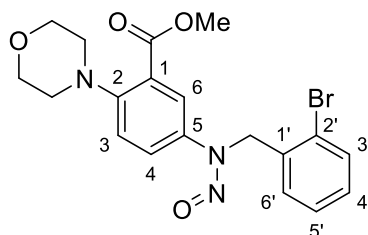

The reaction was carried out following General Procedure **3.1.2**, using methyl 5-((2-bromobenzyl)amino)-2-morpholinobenzoate **6h** (0.075 g, 0.19 mmol), NaNO<sub>2</sub> (0.016 g, 0.20 mmol) and *para*-toluenesulfonic acid monohydrate (0.044g, 0.20 mmol) in CH<sub>2</sub>Cl<sub>2</sub> (5 mL) for 18 h. The crude product was purified using flash chromatography (4:1 petroleum ether, ethyl acetate) to give the *title product* **7h** (0.052 g, 65%) as a yellow solid. M.p.: 103 - 105 °C. Rf: 0.43 (2:1 petroleum ether, ethyl acetate). IR:  $\nu_{\text{max}}$  (film)/cm<sup>-1</sup>; 2948 (CH aromatic), 2849 (CH alkane), 1721 (C=O ester), 1442 (N=O), 1210 and 1113 (C-O ether).  $\delta_{\text{H}}$  (400 MHz; CDCl<sub>3</sub>) 3.06 (4H, t,  $J$  = 4.5 Hz, N(CH<sub>2</sub>CH<sub>2</sub>)<sub>2</sub>O), 3.86 (4H, t,  $J$  = 4.5 Hz, N(CH<sub>2</sub>CH<sub>2</sub>)<sub>2</sub>O), 3.89 (3H, s, COOCH<sub>3</sub>), 5.27 (2H, s, CH<sub>2</sub>), 6.77 (1H, dd,  $J$  = 7.5, 1.5 Hz, H-6'), 7.08 (1H, d,  $J$  = 9.0 Hz, H-3), 7.12 (1H, td,  $J$  = 7.5, 2.0 Hz, H-4'), 7.19 (1H, td,  $J$  = 7.5, 1.5 Hz, H-5'), 7.53 (1H, dd,  $J$  = 9.0, 3.0 Hz, H-4), 7.57 (1H, dd,  $J$  = 7.5, 1.5 Hz, H-3'), and 7.96 (1H, d,  $J$  = 3.0 Hz, H-6).  $\delta_{\text{C}}$  (100 MHz; CDCl<sub>3</sub>) 47.8 (CH<sub>2</sub>), 52.5 (COOCH<sub>3</sub>), 52.9 (N(CH<sub>2</sub>CH<sub>2</sub>)<sub>2</sub>O), 67.1 (N(CH<sub>2</sub>CH<sub>2</sub>)<sub>2</sub>O), 119.9 (C-3), 122.7 (C-2'), 123.0 (C-6), 123.8 (C-4), 124.8 (C-1), 128.0 (C-5' and C-6'), 129.4 (C-4'), 132.8 (C-1'), 133.2 (C-3'), 135.4 (C-5), 151.6 (C-2) and 167.2 (C=O).  $m/z$  (ESI<sup>+</sup>): 458 (<sup>81</sup>BrMNa<sup>+</sup>, 100%), 456 (<sup>79</sup>BrMNa<sup>+</sup>, 100), 428 (50), 426 (50). HRMS (ESI<sup>+</sup>): Found (MNa<sup>+</sup>): 458.0502, C<sub>19</sub>H<sub>20</sub><sup>81</sup>BrN<sub>3</sub>NaO<sub>4</sub> requires 458.0511. Found (MNa<sup>+</sup>): 456.0526, C<sub>19</sub>H<sub>20</sub><sup>79</sup>BrN<sub>3</sub>NaO<sub>4</sub> requires 456.0529.

## Methyl 5-((3-bromobenzyl)(nitroso)amino)-2-morpholinobenzoate **7i**

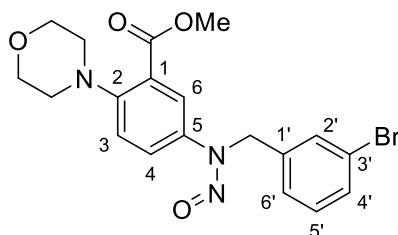

The reaction was carried out following General Procedure **3.1.2**, using methyl 5-((3-bromobenzyl)amino)-2-morpholinobenzoate **6i** (0.075 g, 0.19 mmol), NaNO<sub>2</sub> (0.016 g, 0.20 mmol) and *para*-toluenesulfonic acid monohydrate (0.044g, 0.20 mmol) in CH<sub>2</sub>Cl<sub>2</sub> (5 mL) for 20 h. The crude product was purified using flash chromatography (4:1 petroleum ether, ethyl acetate) to give the *title product* **7i** (0.075 g, 94%) as a red/orange oil. R<sub>f</sub>: 0.40 (2:1 petroleum ether, ethyl acetate). IR:  $\nu_{\text{max}}$  (film)/cm<sup>-1</sup>; 2948 (CH aromatic), 2863 (CH alkane), 1721 (C=O ester), 1432 (N=O), 1229 and 1113 (C-O ether).  $\delta_{\text{H}}$  (400 MHz; CDCl<sub>3</sub>) 3.08 (4H, t,  $J$  = 4.5 Hz, N(CH<sub>2</sub>CH<sub>2</sub>)<sub>2</sub>O), 3.87 (4H, t,  $J$  = 4.5 Hz, N(CH<sub>2</sub>CH<sub>2</sub>)<sub>2</sub>O), 3.90 (3H, s, COOCH<sub>3</sub>), 5.17 (2H, s, CH<sub>2</sub>), 7.00 (1H, dt,  $J$  = 8.5, 1.0 Hz, H-6'), 7.09 (1H, d,  $J$  = 9.0 Hz, H-3), 7.16 (1H, t,  $J$  = 8.5 Hz, H-5'), 7.25 (1H, t,  $J$  = 1.5 Hz, H-2'), 7.38 – 7.40 (1H, m, H-4'), 7.55 (1H, dd,  $J$  = 9.0, 3.0 Hz, H-4) and 7.93 (1H, d,  $J$  = 3.0 Hz, H-6).  $\delta_{\text{C}}$  (100 MHz; CDCl<sub>3</sub>) 46.8 (CH<sub>2</sub>), 52.5 (COOCH<sub>3</sub>), 52.8 (N(CH<sub>2</sub>CH<sub>2</sub>)<sub>2</sub>O), 67.1 (N(CH<sub>2</sub>CH<sub>2</sub>)<sub>2</sub>O), 120.0 (C-3), 123.1 (C-3'), 123.3 (C-6), 124.2 (C-4), 124.6 (C-1), 126.0 (C-6'), 130.5 (C-2'), 130.6 (C-5'), 131.1 (C-4'), 135.3 (C-5), 136.5 (C-1'), 151.7 (C-2) and 167.1 (C=O).  $m/z$  (ESI<sup>+</sup>): 458 (<sup>81</sup>BrMNa<sup>+</sup>, 100%), 456 (<sup>79</sup>BrMNa<sup>+</sup>, 100), 428 (50), 426 (50). HRMS (ESI<sup>+</sup>): Found (MNa<sup>+</sup>): 458.0495, C<sub>19</sub>H<sub>20</sub><sup>81</sup>BrN<sub>3</sub>NaO<sub>4</sub> requires 458.0511. Found (MNa<sup>+</sup>): 456.0518, C<sub>19</sub>H<sub>20</sub><sup>79</sup>BrN<sub>3</sub>NaO<sub>4</sub> requires 456.0529.

### Methyl 5-((4-bromobenzyl)(nitroso)amino)-2-morpholinobenzoate **7j**

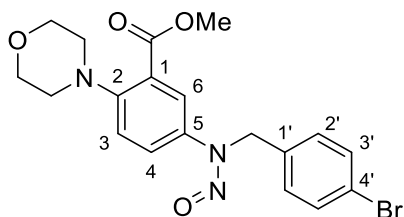

The reaction was carried out following General Procedure **3.1.2**, using methyl 5-((4-bromobenzyl)amino)-2-morpholinobenzoate **6j** (0.075 g, 0.19 mmol), NaNO<sub>2</sub> (0.016 g, 0.20 mmol) and *para*-toluenesulfonic acid monohydrate (0.044g, 0.20 mmol) in CH<sub>2</sub>Cl<sub>2</sub> (5 mL) for 25 h. The crude product was purified using flash chromatography (4:1 petroleum ether, ethyl acetate) to give the *title product* **7j** (0.068 g, 85%) as a reddish brown solid. M.p.: 90 - 92 °C. R<sub>f</sub>: 0.41 (2:1 petroleum ether, ethyl acetate). IR:  $\nu_{\text{max}}$  (film)/cm<sup>-1</sup>; 2963 (CH aromatic), 2868 (CH alkane), 1709 (C=O ester), 1444 (N=O), 1227 and 1114 (C-O ether).  $\delta_{\text{H}}$  (400 MHz; (CD<sub>3</sub>)<sub>2</sub>SO) 2.98 (4H, t, *J* = 4.5 Hz, N(CH<sub>2</sub>CH<sub>2</sub>)<sub>2</sub>O), 3.70 (4H, t, *J* = 4.5 Hz, N(CH<sub>2</sub>CH<sub>2</sub>)<sub>2</sub>O), 3.82 (3H, s, COOCH<sub>3</sub>), 5.29 (2H, s, CH<sub>2</sub>), 7.02 (2H, d, *J* = 8.5 Hz, H-2'), 7.19 (1H, d, *J* = 9.0 Hz, H-3), 7.49 (2H, d, *J* = 8.5 Hz, H-3'), 7.69 (1H, dd, *J* = 9.0, 3.0 Hz, H-4) and 7.84 (1H, d, *J* = 3.0 Hz, H-6).  $\delta_{\text{C}}$  (100 MHz; (CD<sub>3</sub>)<sub>2</sub>SO) 45.8 (CH<sub>2</sub>), 51.9 (N(CH<sub>2</sub>CH<sub>2</sub>)<sub>2</sub>O), 52.2 (COOCH<sub>3</sub>), 66.2 (N(CH<sub>2</sub>CH<sub>2</sub>)<sub>2</sub>O), 119.8 (C-3), 120.5 (C-4'), 122.5 (C-6), 124.2 (C-1), 124.3 (C-4), 129.4 (C-2'), 131.6 (C-3'), 133.9 (C-1'), 134.1 (C-5), 150.5 (C-2) and 167.0 (C=O). *m/z* (ESI<sup>+</sup>): 458 (<sup>81</sup>BrMNa<sup>+</sup>, 100%), 456 (<sup>79</sup>BrMNa<sup>+</sup>, 100), 428 (50), 426 (50). HRMS (ESI<sup>+</sup>): Found (MNa<sup>+</sup>): 458.0509, C<sub>19</sub>H<sub>20</sub><sup>81</sup>BrN<sub>3</sub>NaO<sub>4</sub> requires 458.0511. Found (MNa<sup>+</sup>): 456.0526, C<sub>19</sub>H<sub>20</sub><sup>79</sup>BrN<sub>3</sub>NaO<sub>4</sub> requires 456.0529.

## Methyl 5-((2-methoxybenzyl)(nitroso)amino)-2-morpholinobenzoate **7k**

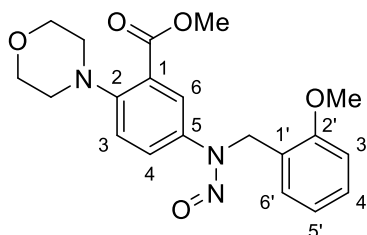

The reaction was carried out following General Procedure **3.1.2**, methyl 5-((2-methoxybenzyl)amino)-2-morpholinobenzoate **6k** (0.075 g, 0.21 mmol), NaNO<sub>2</sub> (0.016 g, 0.22 mmol) and *para*-toluenesulfonic acid monohydrate (0.042g, 0.22 mmol) in CH<sub>2</sub>Cl<sub>2</sub> (5 mL) for 22 h. The crude product was purified using flash chromatography (4:1 petroleum ether, ethyl acetate) to give the *title product* **7k** (0.067 g, 82%) as a yellow/brown solid. M.p.: 75 – 77 °C. R<sub>f</sub>: 0.23 (3:1 petroleum ether, ethyl acetate). IR:  $\nu_{\text{max}}$  (film)/cm<sup>-1</sup>; 2963 (CH aromatic), 2843 (CH alkane), 1708 (C=O ester), 1435 (N=O), 1210 and 1113 (C-O ether).  $\delta_{\text{H}}$  (400 MHz; (CD<sub>3</sub>)<sub>2</sub>SO) 2.97 (4H, t, *J* = 4.5 Hz, N(CH<sub>2</sub>CH<sub>2</sub>)<sub>2</sub>O), 3.69 (4H, t, *J* = 4.5 Hz, N(CH<sub>2</sub>CH<sub>2</sub>)<sub>2</sub>O), 3.75 (3H, s, 2'-OCH<sub>3</sub>), 3.81 (3H, s, COOCH<sub>3</sub>), 5.18 (2H, s, CH<sub>2</sub>), 6.78 – 6.84 (2H, m, H-5' and H-6'), 6.97 (1H, d, *J* = 8.0 Hz, H-3'), 7.18 (1H, d, *J* = 9.0 Hz, H-3), 7.20 – 7.25 (1H, m, H-4'), 7.65 (1H, dd, *J* = 9.0, 3.0 Hz, H-4) and 7.81 (1H, d, *J* = 3.0 Hz, H-6).  $\delta_{\text{C}}$  (100 MHz; (CD<sub>3</sub>)<sub>2</sub>SO) 42.4 (CH<sub>2</sub>), 51.9 (N(CH<sub>2</sub>CH<sub>2</sub>)<sub>2</sub>O), 52.2 (COOCH<sub>3</sub>), 55.4 (2'-OCH<sub>3</sub>), 66.2 (N(CH<sub>2</sub>CH<sub>2</sub>)<sub>2</sub>O), 110.9 (C-3'), 119.7 (C-3), 120.3 (C-5'), 121.6 (C-1'), 122.7 (C-6), 123.9 (C-1), 124.5 (C-4), 127.9 (C-6'), 128.9 (C-4'), 134.5 (C-5), 150.5 (C-2), 156.6 (C-2') and 167.0 (C=O). *m/z* (ESI<sup>+</sup>): 408 (MNa<sup>+</sup>, 40%), 378 (100). HRMS (ESI<sup>+</sup>): Found (MNa<sup>+</sup>): 408.1520, C<sub>20</sub>H<sub>23</sub>N<sub>3</sub>NaO<sub>5</sub> requires 408.1530.

### Methyl 5-((3-methoxybenzyl)(nitroso)amino)-2-morpholinobenzoate **71**

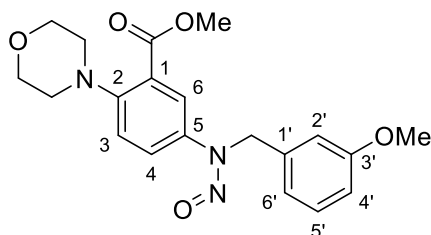

The reaction was carried out following General Procedure **3.1.2**, methyl 5-((3-methoxybenzyl)amino)-2-morpholinobenzoate **61** (0.075 g, 0.21 mmol), NaNO<sub>2</sub> (0.016 g, 0.22 mmol) and *para*-toluenesulfonic acid monohydrate (0.042g, 0.22 mmol) in CH<sub>2</sub>Cl<sub>2</sub> (5 mL) for 17 h. The crude product was purified using flash chromatography (4:1 petroleum ether, ethyl acetate) to give the *title product* **71** (0.064 g, 78%) as a red/orange oil. R<sub>f</sub>: 0.34 (2:1 petroleum ether, ethyl acetate). IR:  $\nu_{\text{max}}$  (film)/cm<sup>-1</sup>; 2963 (CH aromatic), 2840 (CH alkane), 1720 (C=O ester), 1435 (N=O), 1228 and 1114 (C-O ether).  $\delta_{\text{H}}$  (400 MHz; CDCl<sub>3</sub>) 3.07 (4H, t,  $J$  = 4.5 Hz, N(CH<sub>2</sub>CH<sub>2</sub>)<sub>2</sub>O), 3.75 (3H, s, 3'-OCH<sub>3</sub>), 3.86 (4H, t,  $J$  = 4.5 Hz, N(CH<sub>2</sub>CH<sub>2</sub>)<sub>2</sub>O), 3.89 (3H, s, COOCH<sub>3</sub>), 5.19 (2H, s, CH<sub>2</sub>), 6.61 (1H, t,  $J$  = 2.0 Hz, H-2'), 6.67 (1H, d,  $J$  = 8.0 Hz, H-6'), 6.77 (1H, dd,  $J$  = 8.0, 2.0 Hz, H-4'), 7.07 (1H, d,  $J$  = 9.0 Hz, H-3), 7.20 (1H, t,  $J$  = 8.0 Hz, H-5'), 7.55 (1H, dd,  $J$  = 9.0, 3.0 Hz, H-4) and 7.97 (1H, d,  $J$  = 3.0 Hz, H-6).  $\delta_{\text{C}}$  (100 MHz; CDCl<sub>3</sub>) 47.2 (CH<sub>2</sub>), 52.9 (N(CH<sub>2</sub>CH<sub>2</sub>)<sub>2</sub>O), 52.5 (COOCH<sub>3</sub>), 55.4 (3'-OCH<sub>3</sub>), 67.1 (N(CH<sub>2</sub>CH<sub>2</sub>)<sub>2</sub>O), 113.1 (C-2'), 113.3 (C-4'), 119.6 (C-6'), 120.0 (C-3), 123.3 (C-6), 124.1 (C-4), 124.8 (C-1), 130.1 (C-5'), 135.8 (C-1'), 135.9 (C-5), 151.3 (C-2), 160.1 (C-3') and 167.2 (C=O).  $m/z$  (ESI<sup>+</sup>): 408 (MNa<sup>+</sup>, 60%), 378 (100). HRMS (ESI<sup>+</sup>): Found (MNa<sup>+</sup>): 408.1527, C<sub>20</sub>H<sub>23</sub>N<sub>3</sub>NaO<sub>5</sub> requires 408.1530.

### Methyl 5-((4-methoxybenzyl)(nitroso)amino)-2-morpholinobenzoate **7m**

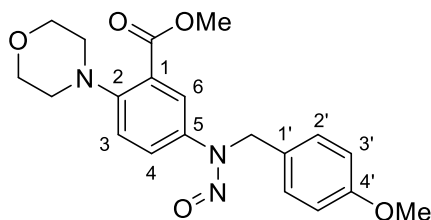

The reaction was carried out following General Procedure **3.1.2**, methyl 5-((4-methoxybenzyl)amino)-2-morpholinobenzoate **6m** (0.075 g, 0.21 mmol), NaNO<sub>2</sub> (0.016 g, 0.22 mmol) and *para*-toluenesulfonic acid monohydrate (0.042g, 0.22 mmol) in CH<sub>2</sub>Cl<sub>2</sub> (5 mL) for 17 h. The crude product was purified using flash chromatography (4:1 petroleum ether, ethyl acetate) to give the *title product* **7m** (0.055 g, 73%) as a red solid M.p.: 103 – 105 °C. Rf: 0.31 (2:1 petroleum ether, ethyl acetate). IR:  $\nu_{\text{max}}$  (film)/cm<sup>-1</sup>; 2967 (CH aromatic), 2840 (CH alkane), 1706 (C=O ester), 1446 (N=O), 1249 and 1113 (C-O ether).  $\delta_{\text{H}}$  (400 MHz; (CD<sub>3</sub>)<sub>2</sub>SO) 2.97 (4H, t, *J* = 4.5 Hz, N(CH<sub>2</sub>CH<sub>2</sub>)<sub>2</sub>O), 3.67 (4H, t, *J* = 4.5 Hz, N(CH<sub>2</sub>CH<sub>2</sub>)<sub>2</sub>O), 3.68 (3H, s, 4'-OCH<sub>3</sub>), 3.81 (3H, s, COOCH<sub>3</sub>), 5.24 (2H, s, CH<sub>2</sub>), 6.83 (2H, d, *J* = 9.0 Hz, H-3'), 7.00 (2H, d, *J* = 9.0 Hz, H-2'), 7.19 (1H, d, *J* = 9.0 Hz, H-3), 7.68 (1H, dd, *J* = 9.0, 3.0 Hz, H-4) and 7.83 (1H, d, *J* = 3.0 Hz, H-6).  $\delta_{\text{C}}$  (100 MHz; (CD<sub>3</sub>)<sub>2</sub>SO) 45.5 (CH<sub>2</sub>), 51.9 (N(CH<sub>2</sub>CH<sub>2</sub>)<sub>2</sub>O), 52.2 (COOCH<sub>3</sub>), 55.0 (4'-OCH<sub>3</sub>), 66.1 (N(CH<sub>2</sub>CH<sub>2</sub>)<sub>2</sub>O), 114.1 (C-3'), 119.7 (C-3), 122.6 (C-6), 124.1 (C-1), 124.4 (C-4), 126.3 (C-1'), 128.7 (C-2'), 134.2 (C-5), 150.4 (C-2), 158.5 (C-4') and 167.0 (C=O). *m/z* (ESI<sup>+</sup>): 408 (MNa<sup>+</sup>, 50%), 378 (90), 227 (100). HRMS (ESI<sup>+</sup>): Found (MNa<sup>+</sup>): 408.1528, C<sub>20</sub>H<sub>23</sub>N<sub>3</sub>NaO<sub>5</sub> requires 408.1530.



## NMR Spectra of Compounds 7a-m:

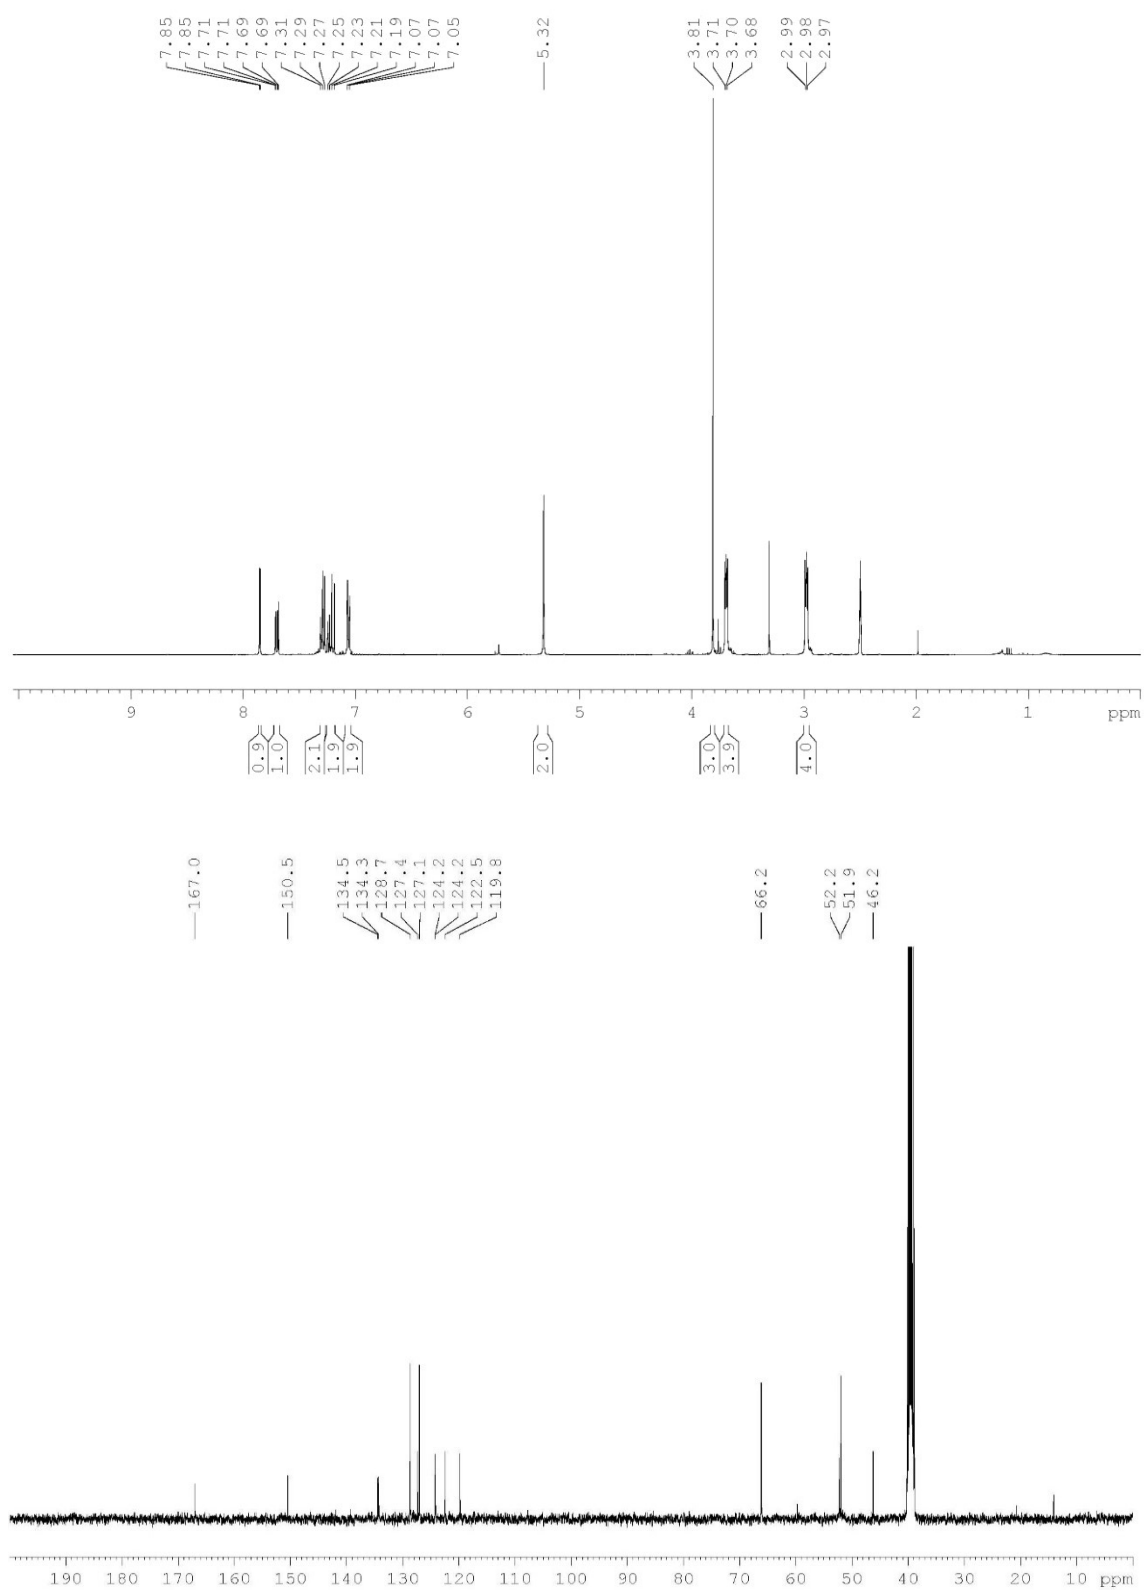

**Figure S1:**  $^1\text{H}$  NMR and  $^{13}\text{C}$  NMR spectra of 7a (400/100 MHz;  $(\text{CD}_3)_2\text{SO}$ ).

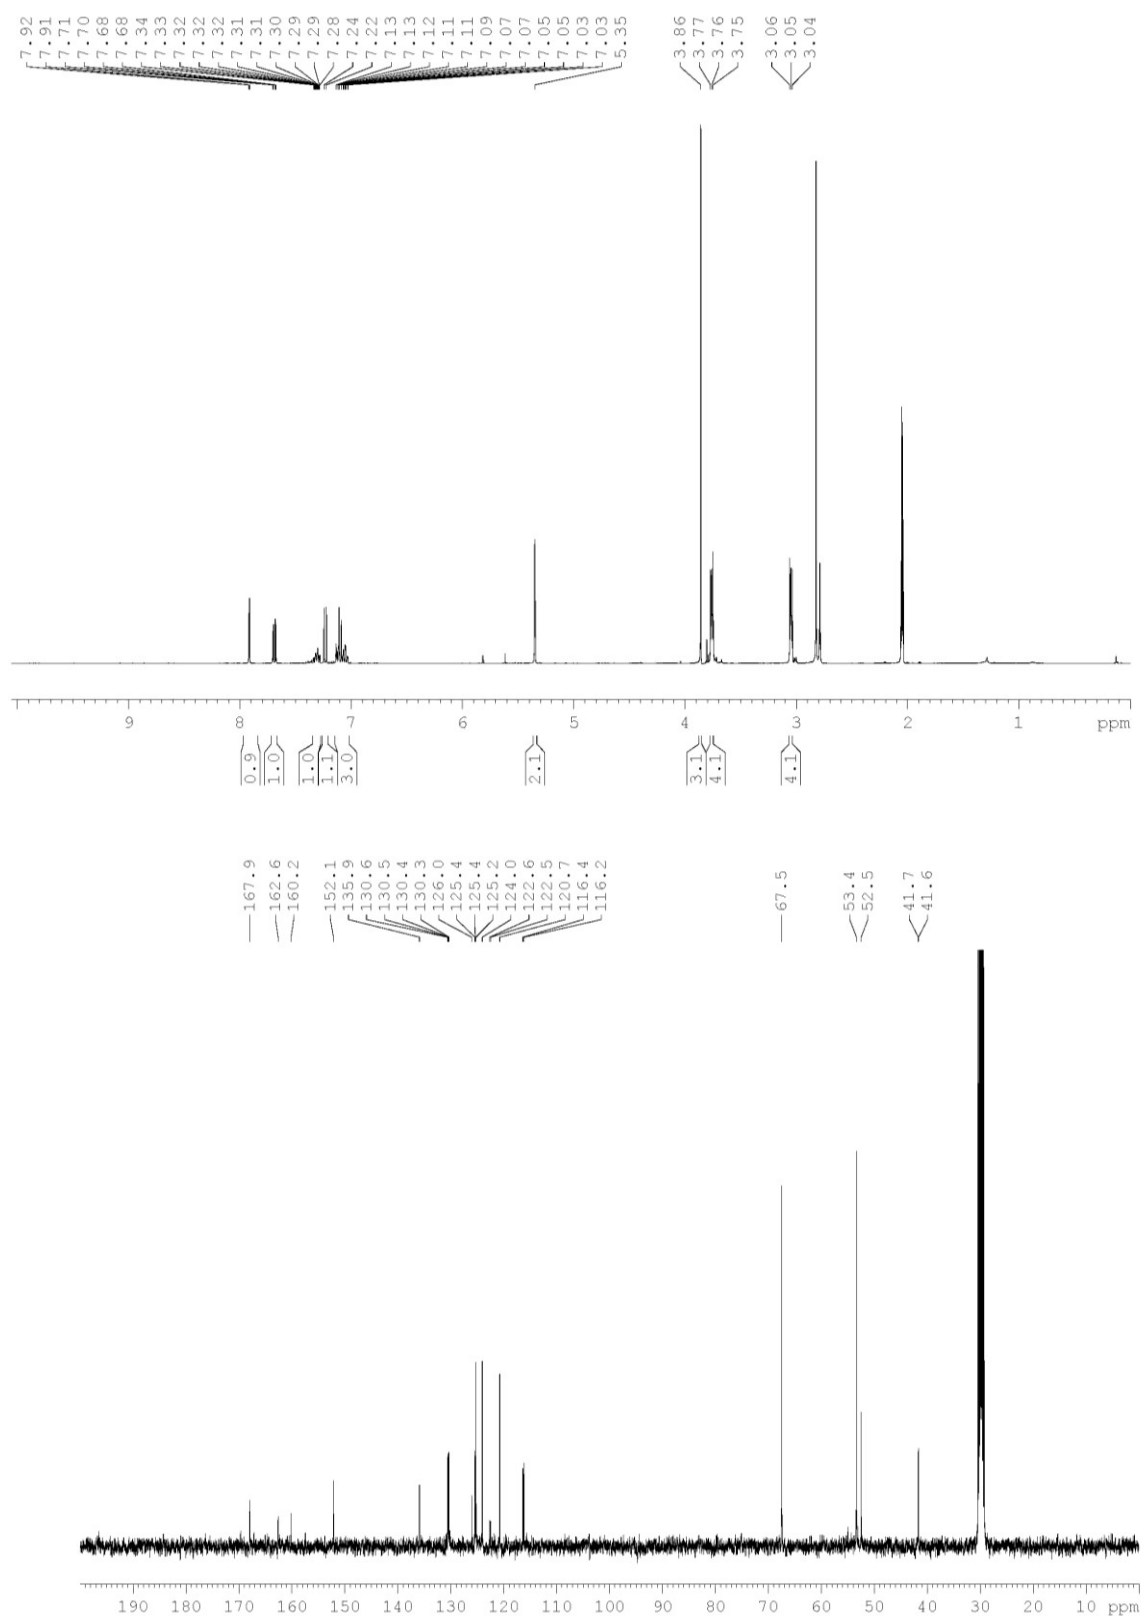

**Figure S2:** <sup>1</sup>H NMR and <sup>13</sup>C NMR spectra of **7b** (400/100 MHz; (CD<sub>3</sub>)<sub>2</sub>CO).

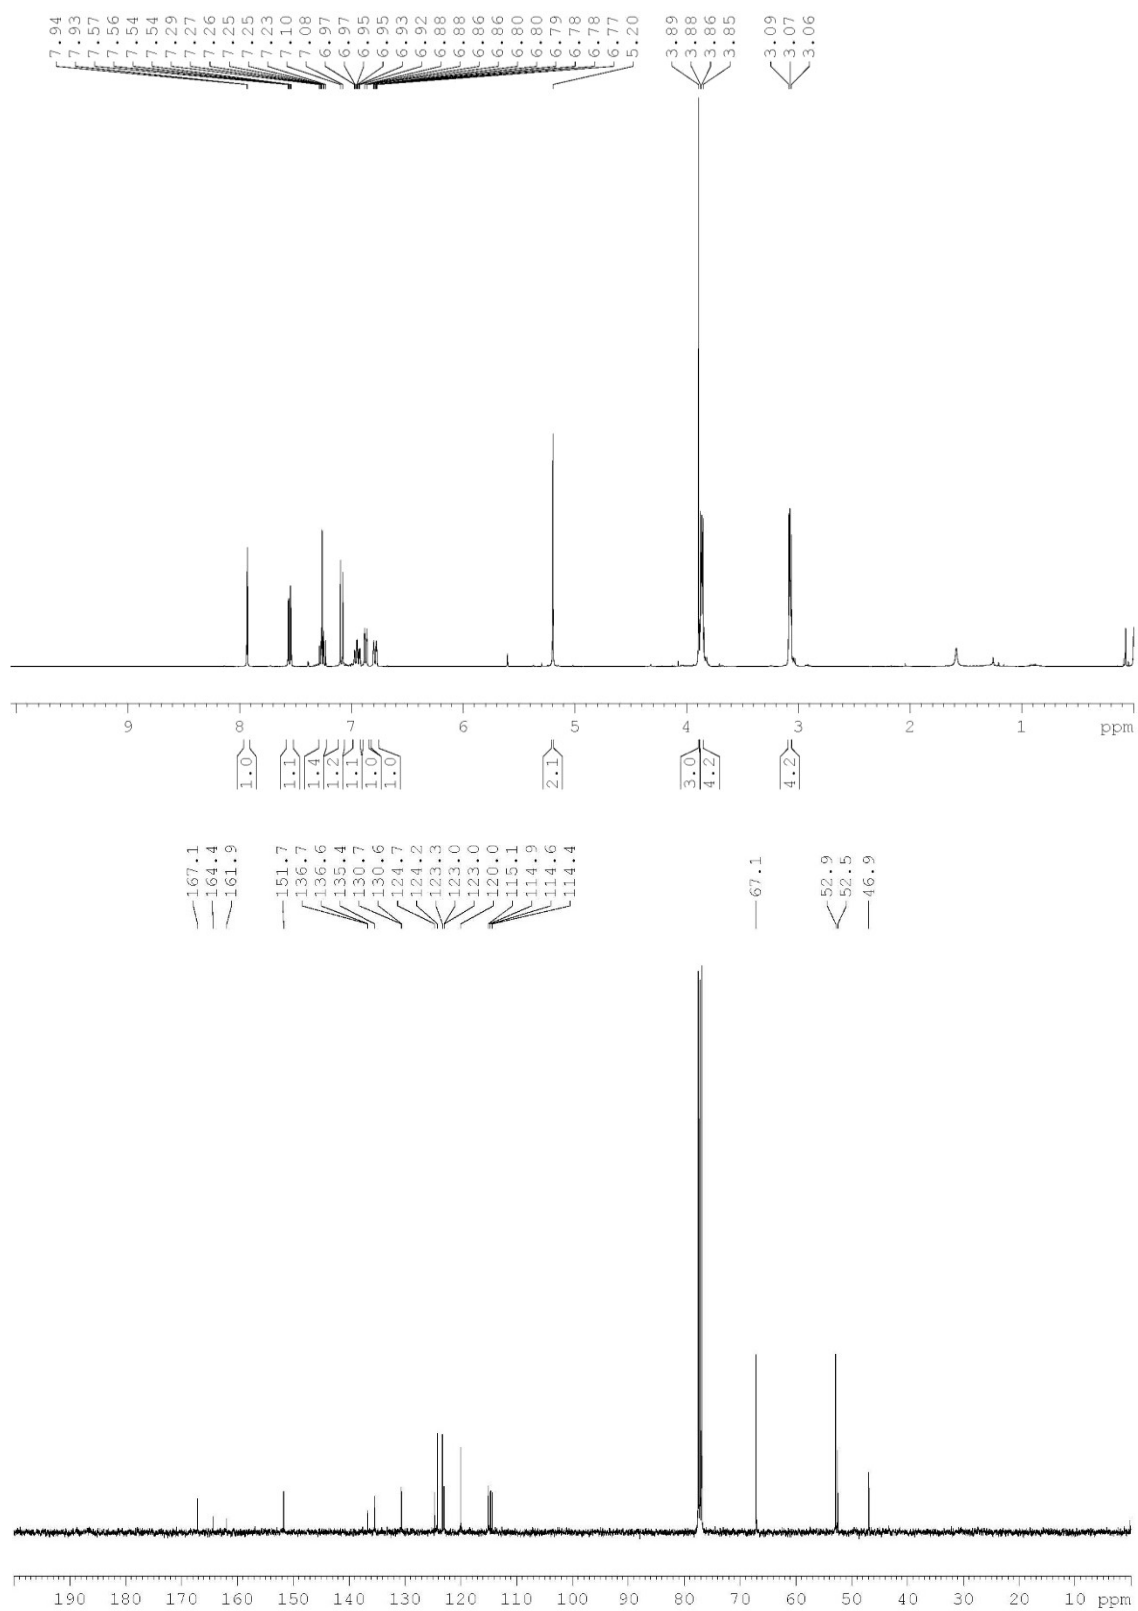

**Figure S3:**  $^1\text{H}$  NMR and  $^{13}\text{C}$  NMR spectra of **7c** (400/100 MHz;  $\text{CDCl}_3$ ).

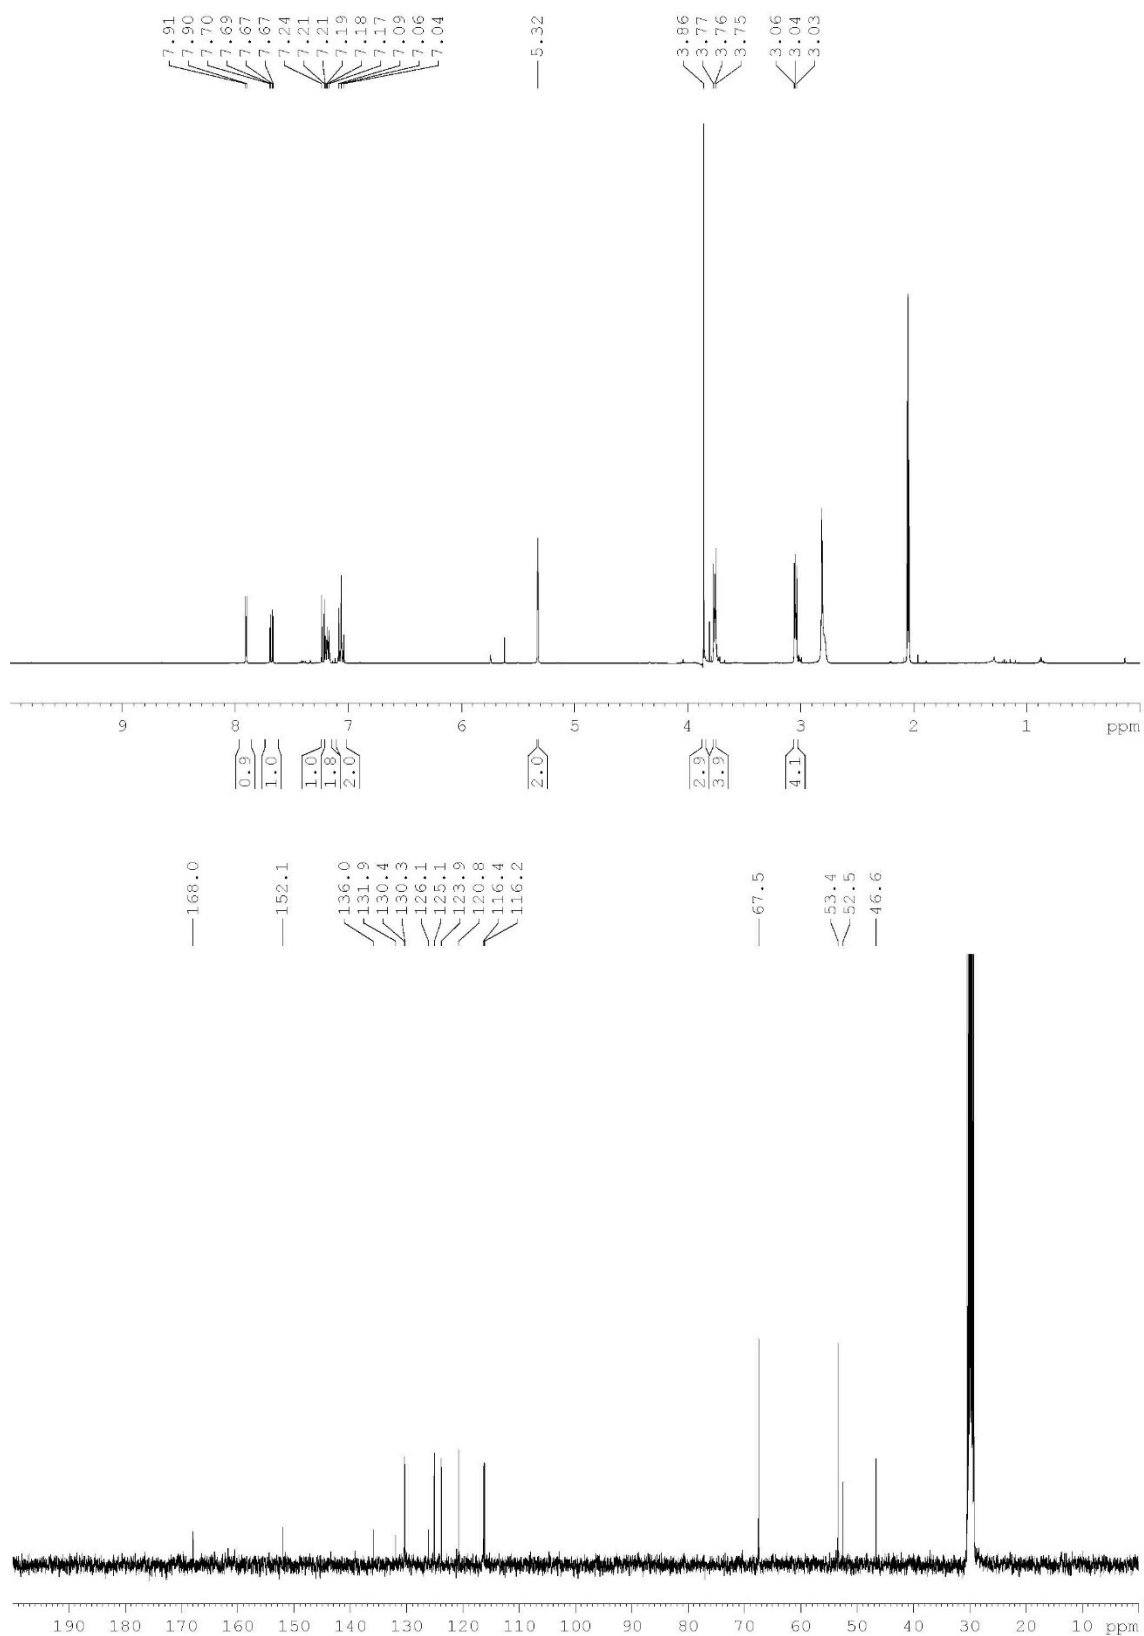

**Figure S4:**  $^1\text{H}$  NMR and  $^{13}\text{C}$  NMR spectra of **7d** (400/100 MHz;  $(\text{CD}_3)_2\text{CO}$ )

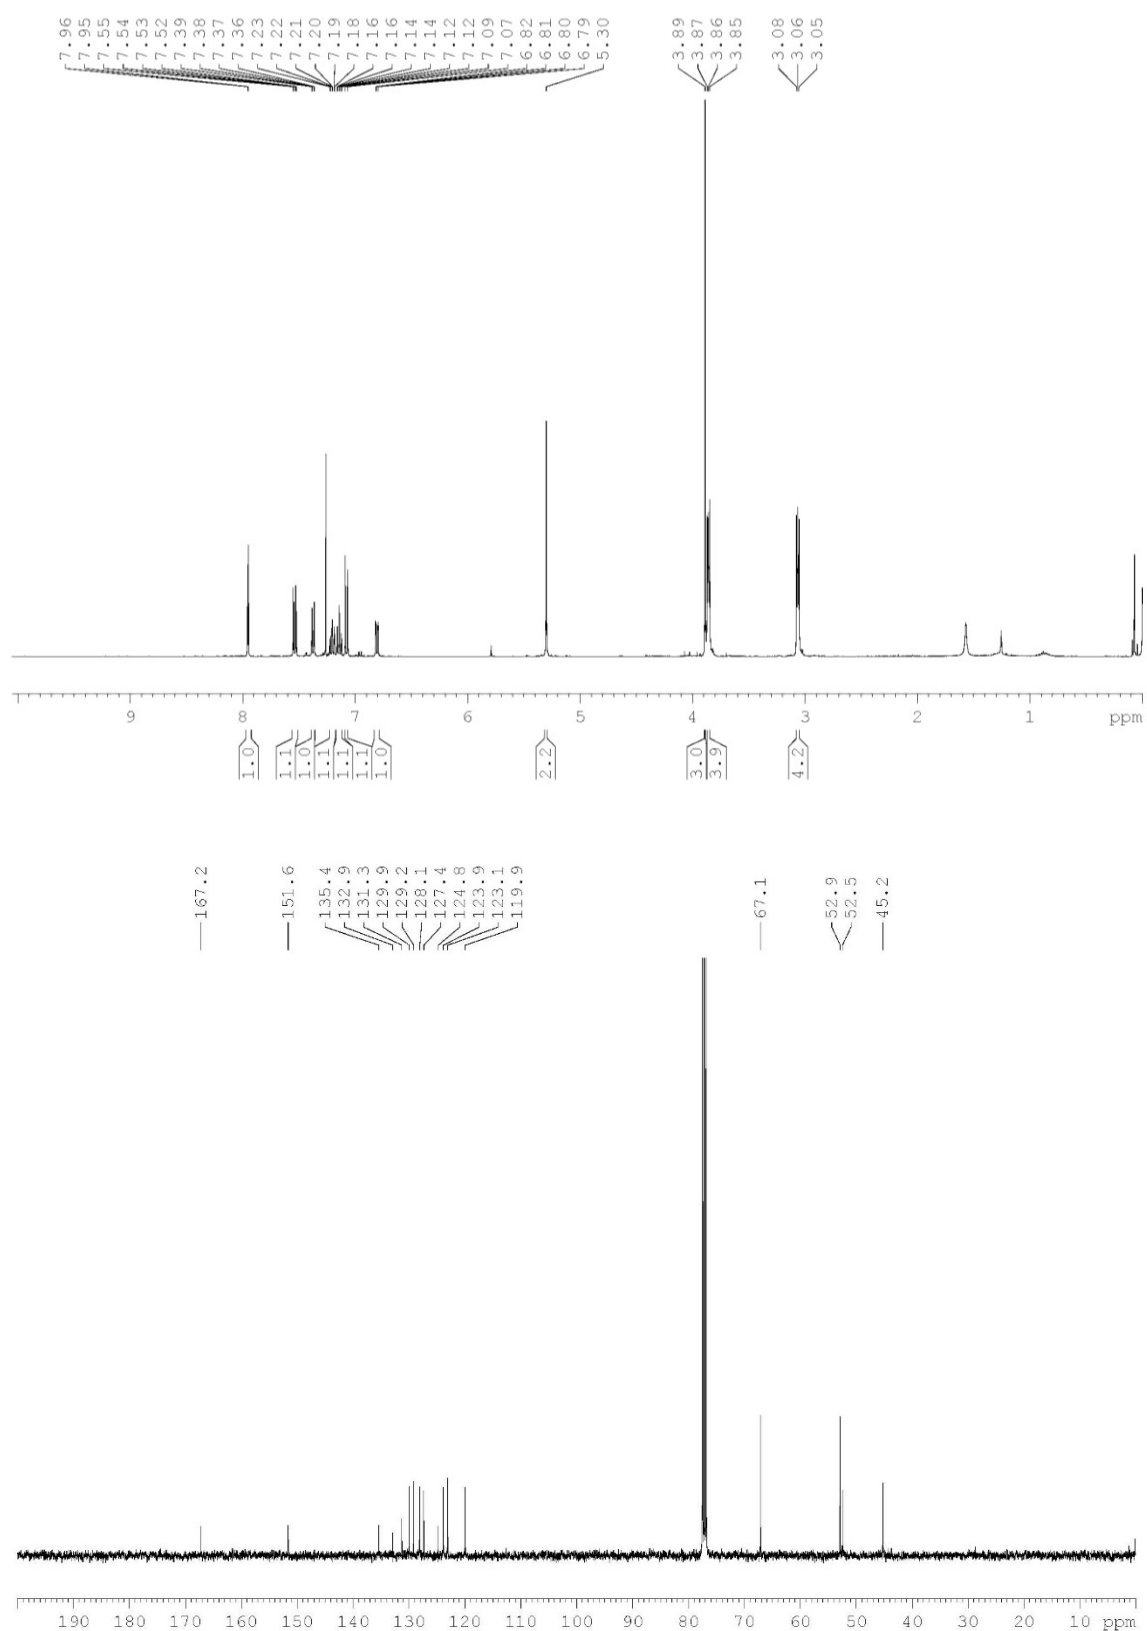

**Figure S5:**  $^1\text{H}$  NMR and  $^{13}\text{C}$  NMR spectra of **7e** (400/100 MHz;  $\text{CDCl}_3$ ).

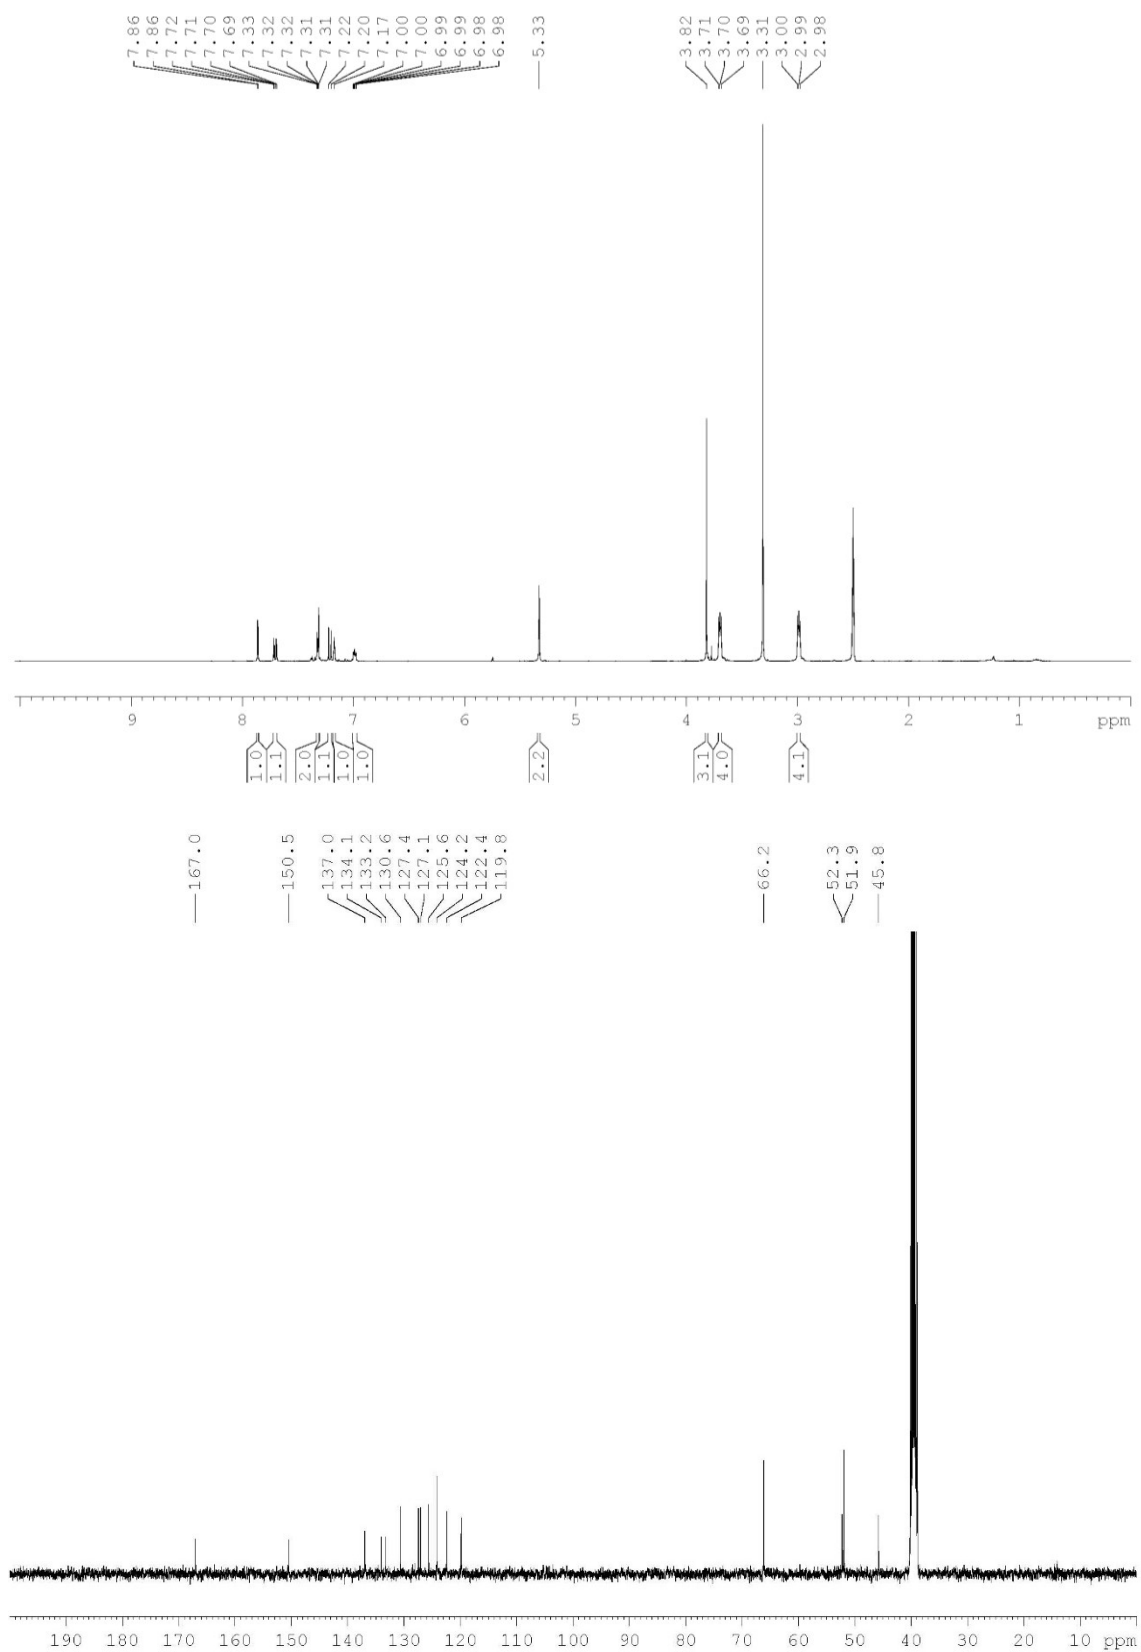

**Figure S6:** <sup>1</sup>H NMR and <sup>13</sup>C NMR spectra of **7f** (400/100 MHz; (CD<sub>3</sub>)<sub>2</sub>SO).

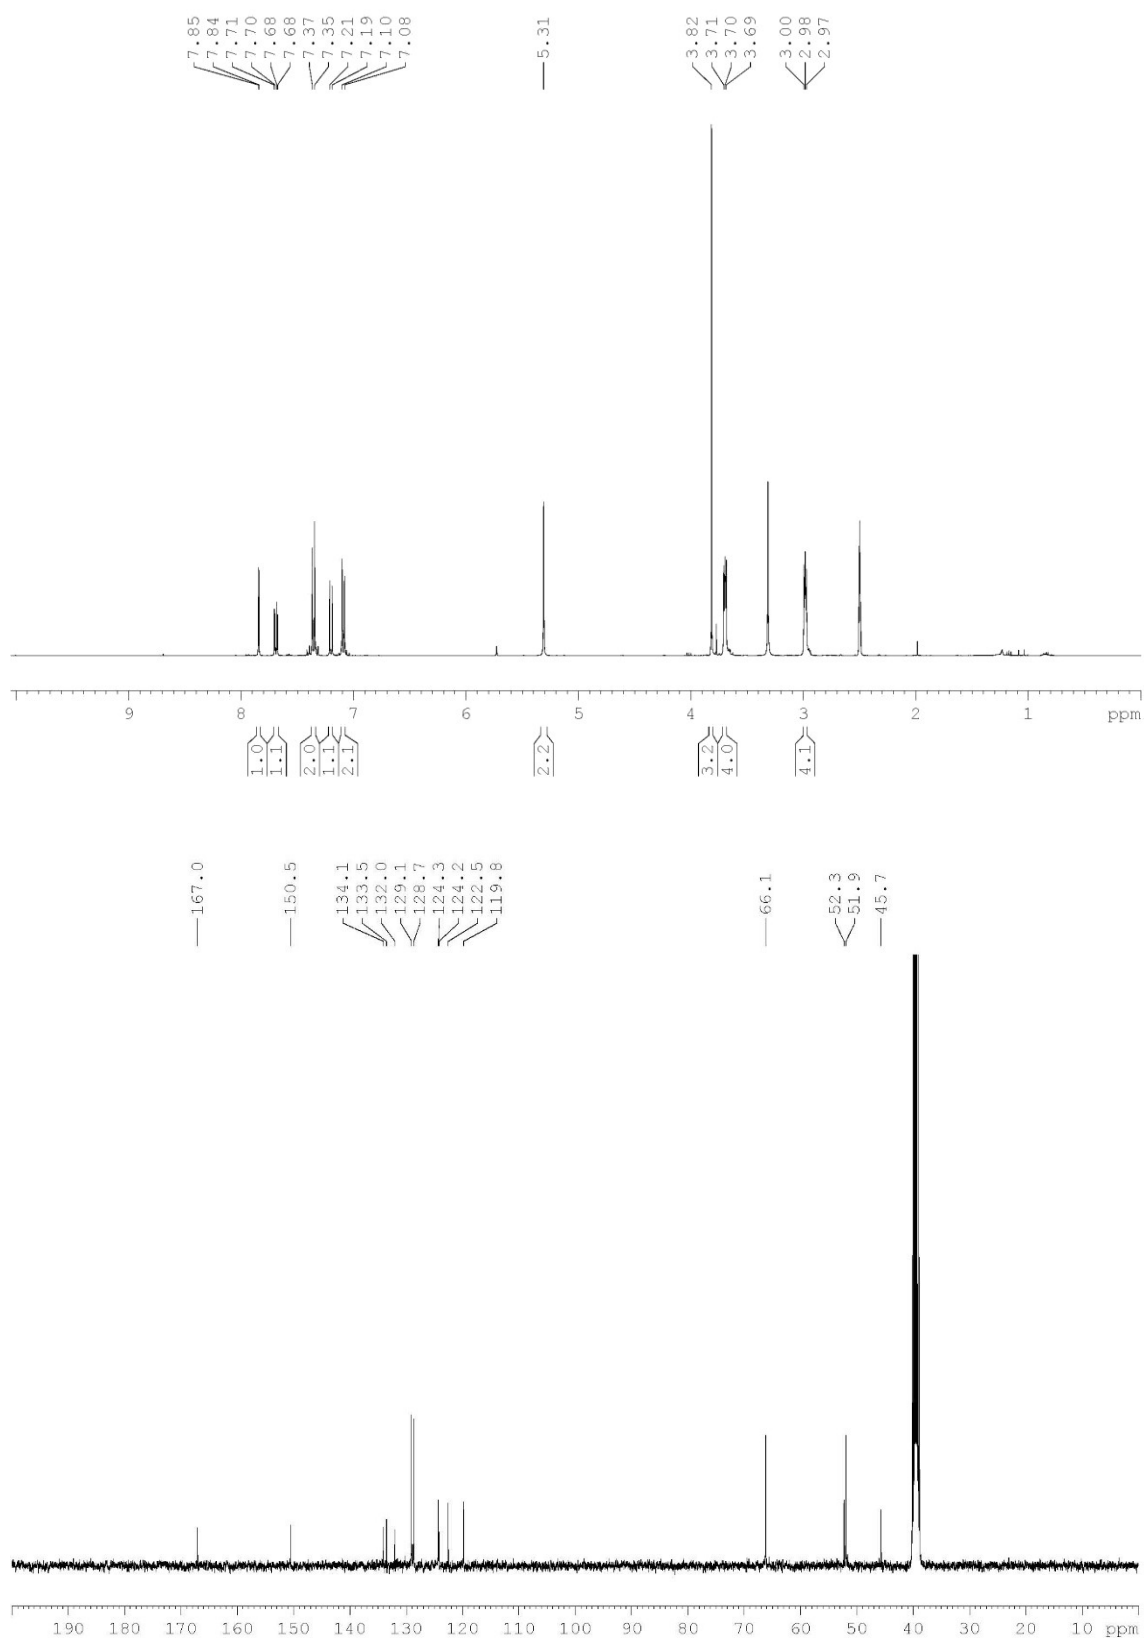

**Figure S7:** <sup>1</sup>H NMR and <sup>13</sup>C NMR spectra of **7g** (400/100 MHz; (CD<sub>3</sub>)<sub>2</sub>SO).

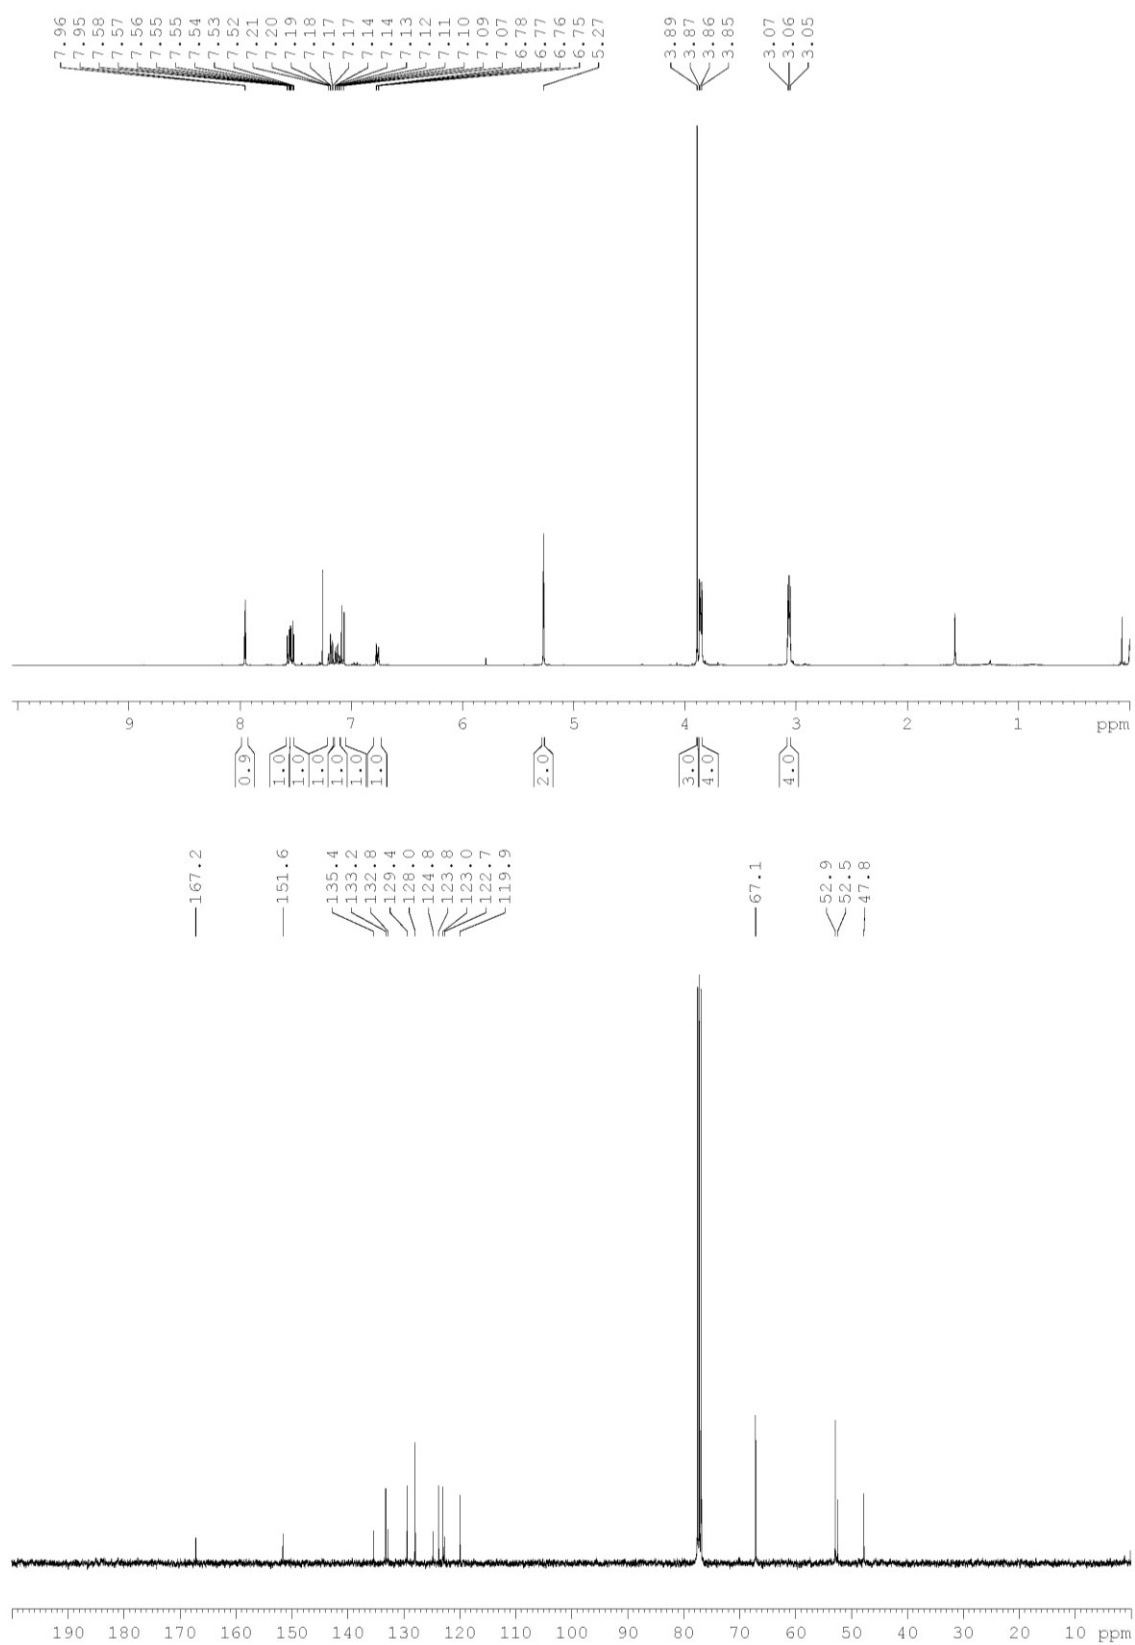

**Figure S8:** <sup>1</sup>H NMR and <sup>13</sup>C NMR spectra of **7h** (400/100 MHz; CDCl<sub>3</sub>).



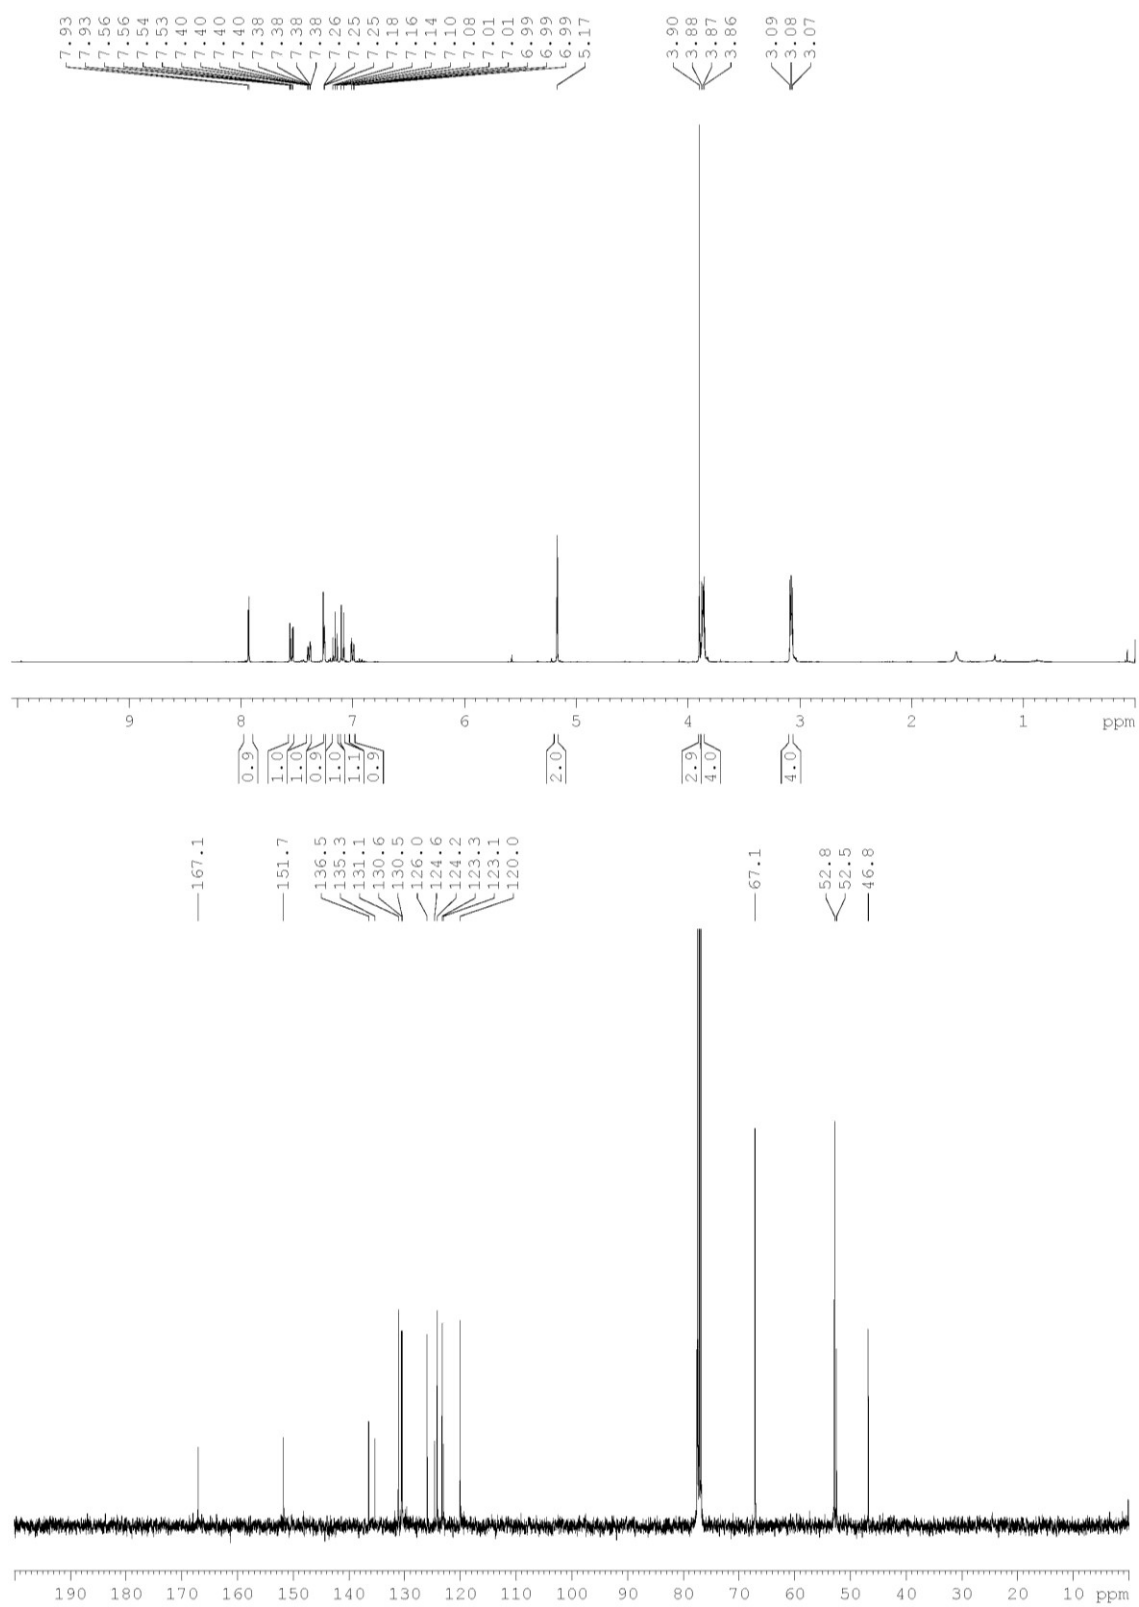

**Figure S9:** <sup>1</sup>H NMR and <sup>13</sup>C NMR spectra of **7i** (400/100 MHz; CDCl<sub>3</sub>).

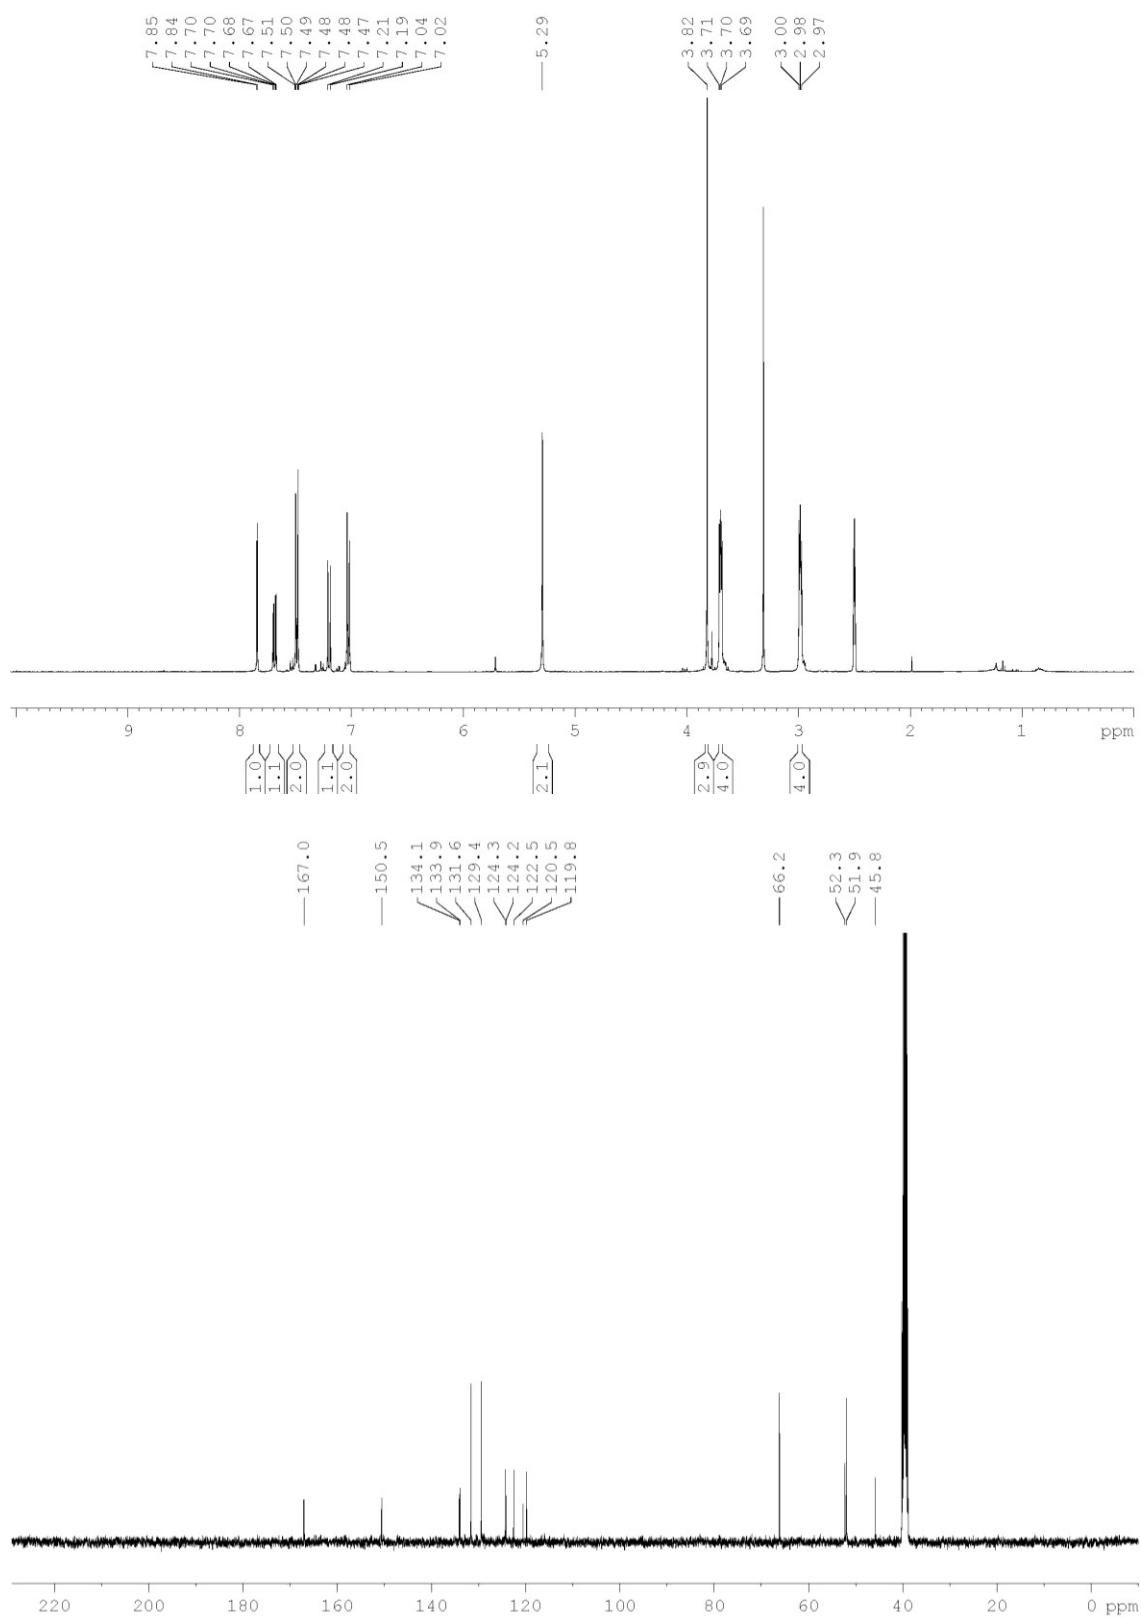

**Figure S10:** <sup>1</sup>H NMR and <sup>13</sup>C NMR spectra of **7j** (400/100 MHz; (CD<sub>3</sub>)<sub>2</sub>SO).



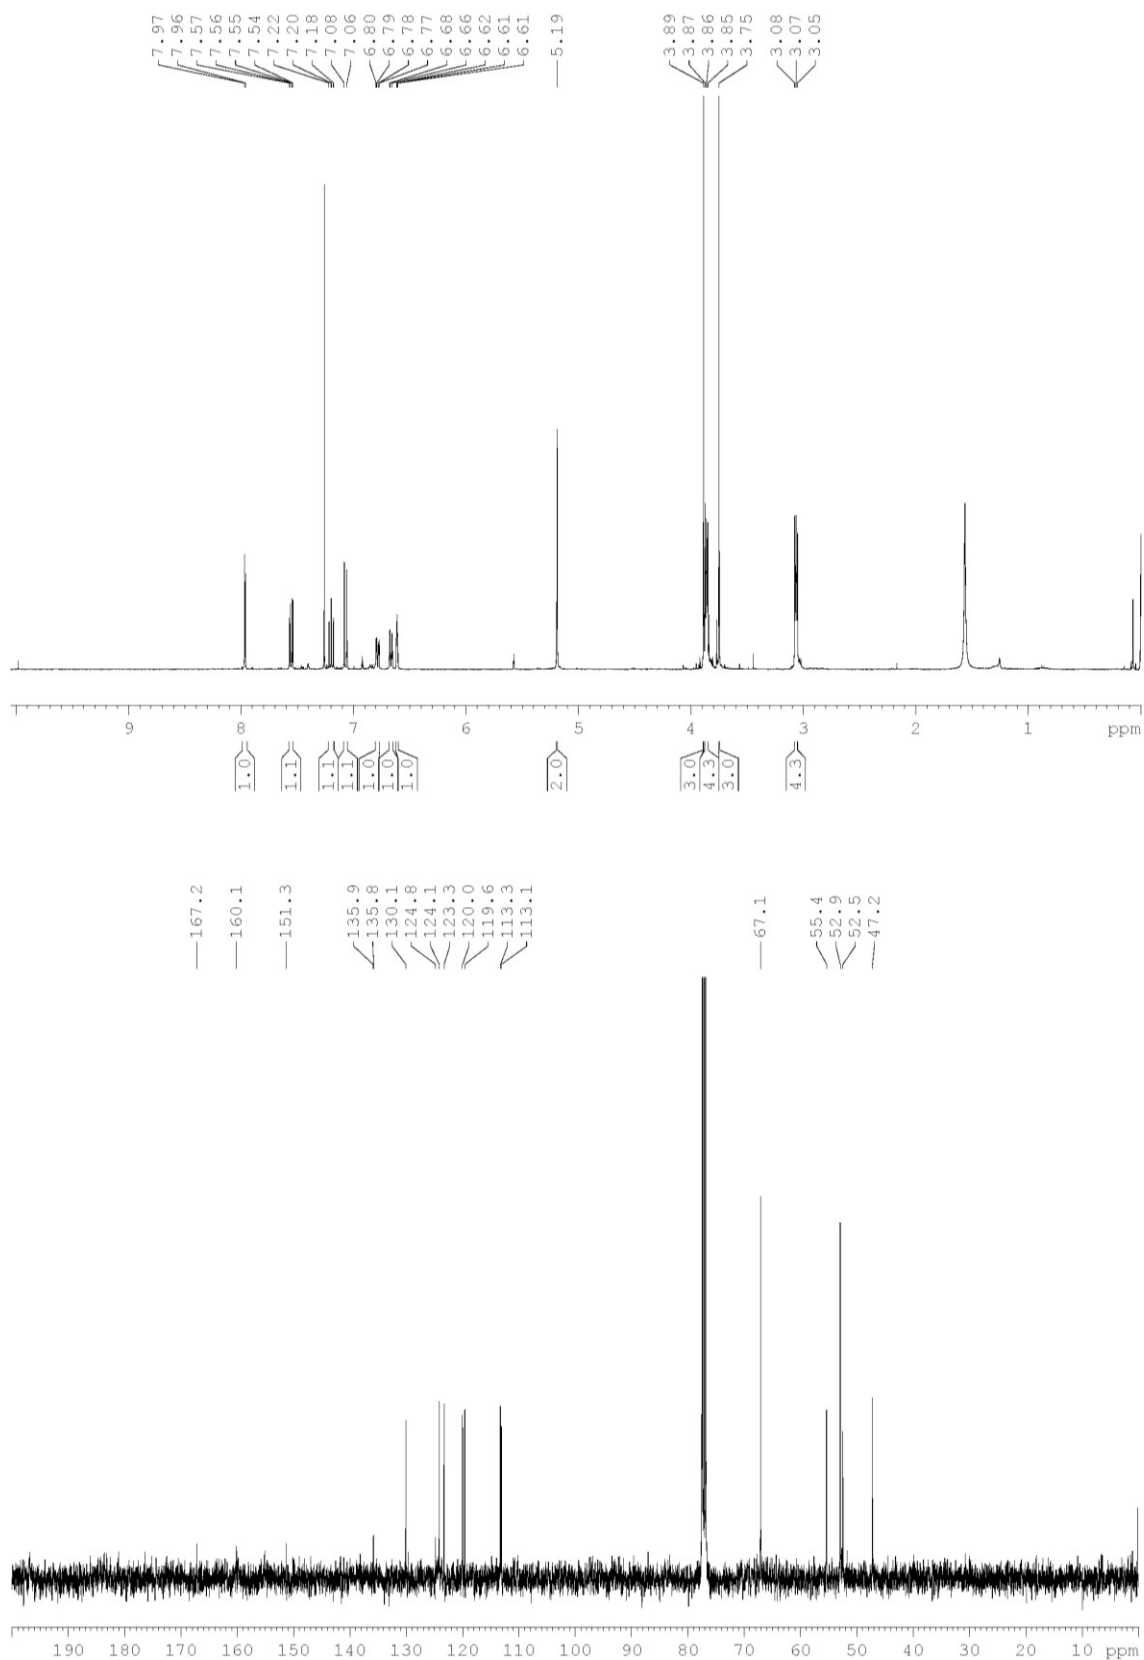

**Figure S12:** <sup>1</sup>H NMR and <sup>13</sup>C NMR spectra of **71** (400/100 MHz; CDCl<sub>3</sub>).

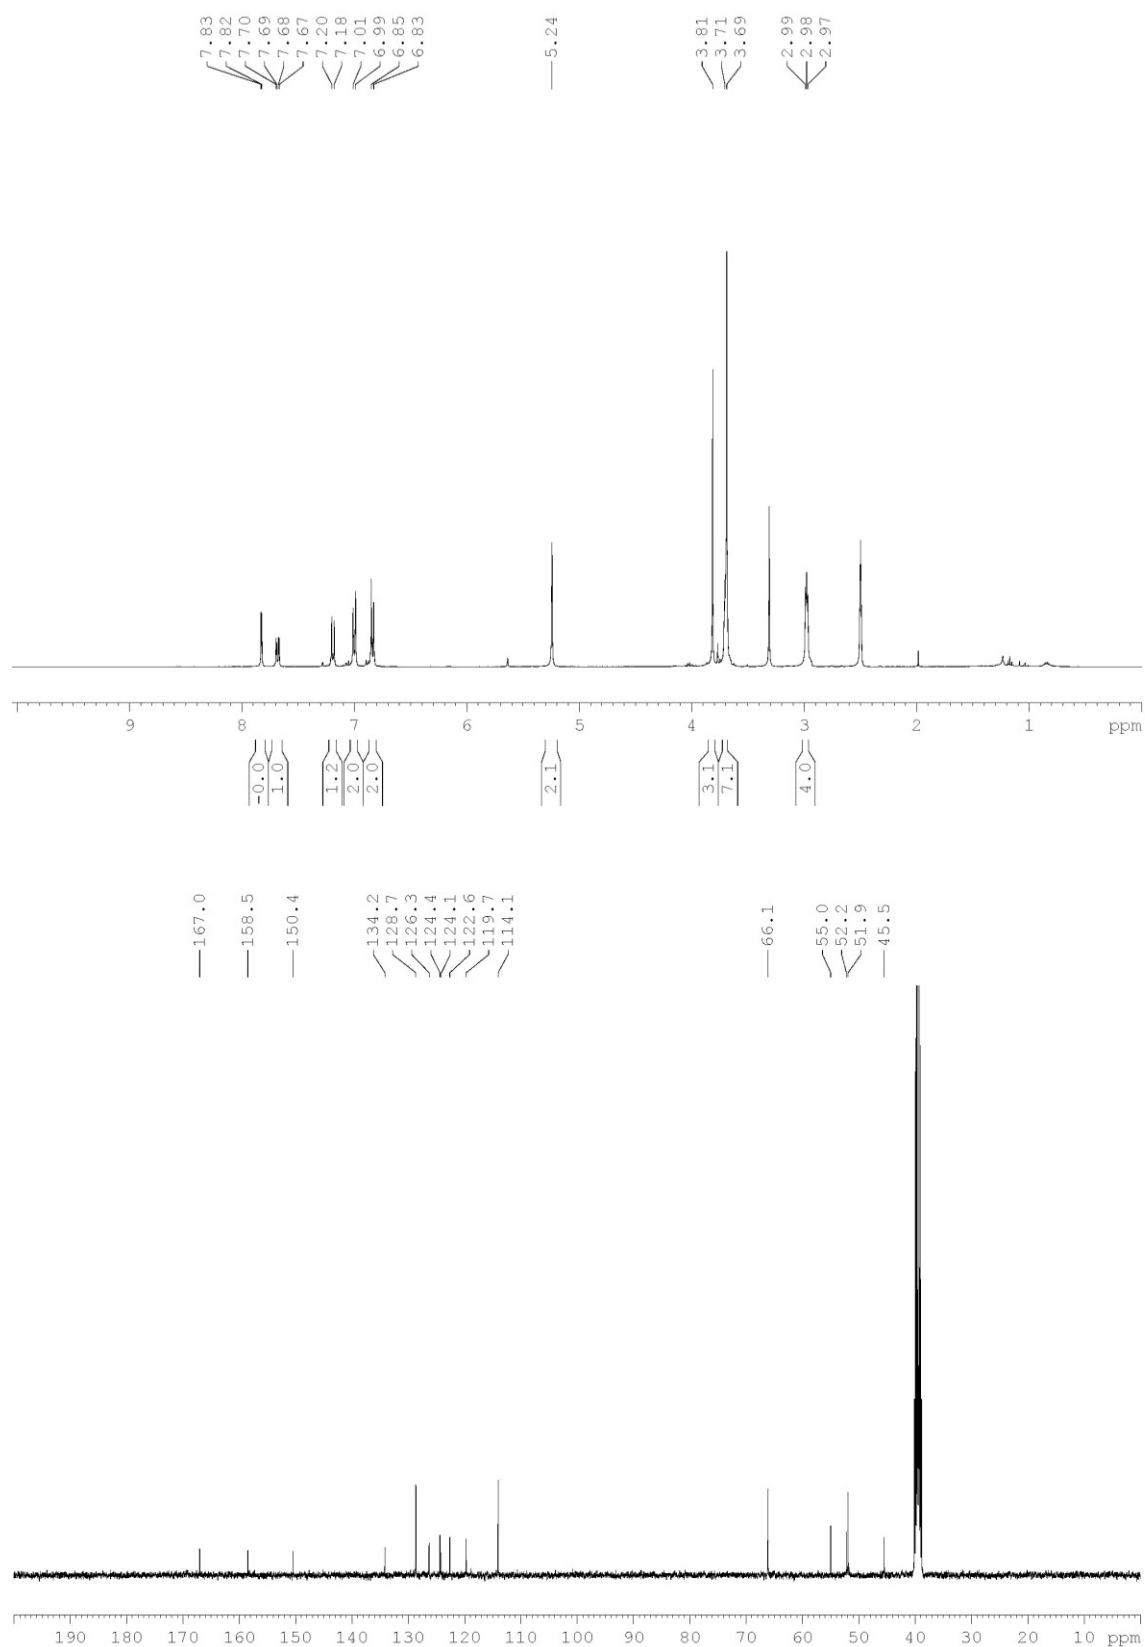

**Figure S13:** <sup>1</sup>H NMR and <sup>13</sup>C NMR spectra of **7m** (400/100 MHz; (CD<sub>3</sub>)<sub>2</sub>SO).

**Table S1:** Drug-likeness of *N*-nitrosylated benzylamines **7a-m** according to Lipinski's rule of five. All compounds adhere to the requirements (MW < 500, HBD < 5, HBA < 5, cLogP < 5).[25]

| Benzylic<br>Substitution of 7 | Molecular<br>Weight | Hydrogen Bond<br>Donors | Hydrogen Bond<br>Acceptors | Calculated<br>LogP |
|-------------------------------|---------------------|-------------------------|----------------------------|--------------------|
| H ( <b>a</b> )                | 355.39              | 0                       | 7                          | 2.804              |
| 2-F ( <b>b</b> )              | 373.38              | 0                       | 7                          | 2.947              |
| 3-F ( <b>c</b> )              | 373.38              | 0                       | 7                          | 2.947              |
| 4-F ( <b>d</b> )              | 373.38              | 0                       | 7                          | 2.947              |
| 2-Cl ( <b>e</b> )             | 389.84              | 0                       | 7                          | 3.517              |
| 3-Cl ( <b>f</b> )             | 389.84              | 0                       | 7                          | 3.517              |
| 4-Cl ( <b>g</b> )             | 389.84              | 0                       | 7                          | 3.517              |
| 2-Br ( <b>h</b> )             | 434.29              | 0                       | 7                          | 3.667              |
| 3-Br ( <b>i</b> )             | 434.29              | 0                       | 7                          | 3.667              |
| 4-Br ( <b>j</b> )             | 434.29              | 0                       | 7                          | 3.667              |
| 2-OMe ( <b>k</b> )            | 385.42              | 0                       | 8                          | 3.723              |
| 3-OMe ( <b>l</b> )            | 385.42              | 0                       | 8                          | 3.723              |
| 4-OMe ( <b>m</b> )            | 385.42              | 0                       | 8                          | 3.723              |
